# Supplementary material for: Production of the Carboxylate Reductase from Nocardia otitidiscaviarum in a Soluble, Active Form for in vitro Applications
Source: PubMed Central journal article supplement — Chembiochem. 2021 Mar 16;22(10):1823–32. doi: 10.1002/cbic.202000846 (PMC8251736; doi:10.1002/cbic.202000846), 2021-03-16
Supplement: CBIC-22-1823-s001.pdf [file CBIC-22-1823-s001.pdf]

# ChemBioChem

Supporting Information

## **Production of the Carboxylate Reductase from *Nocardia otitidiscaviarum* in a Soluble, Active Form for *in vitro* Applications**

Douglas Weber, David Patsch, Annika Neumann, Margit Winkler, and Dörte Rother\*

## Table of content

|                                                                                            |  |
|--------------------------------------------------------------------------------------------|--|
| 1. Enzymes .....                                                                           |  |
| 1.1. SDS gel analysis of the purified enzymes .....                                        |  |
| 2. Molecular biology .....                                                                 |  |
| 2.1. Vector maps .....                                                                     |  |
| 2.1.1. NoCAR .....                                                                         |  |
| 2.1.2. EcPPTase .....                                                                      |  |
| 2.1.3. NoCAR/EcPPTase .....                                                                |  |
| 2.2. Gene sequences .....                                                                  |  |
| 2.3. Cloning .....                                                                         |  |
| 3. Optimization of the NoCAR production in <i>E. coli</i> .....                            |  |
| 3.1. Medium optimization in <i>E. coli</i> BL21 .....                                      |  |
| 3.2. Optimization in <i>E. coli</i> Tuner .....                                            |  |
| 4. Optimization of the post-translational modification of NoCAR via incubation assay ..... |  |
| 5. Biocatalytic reduction reactions with <i>in vitro</i> recycling of cofactors .....      |  |
| 5.1. Auxiliary enzymes for the regeneration of both cofactors .....                        |  |
| 5.2. Reaction components and setup .....                                                   |  |
| 5.3. Investigation of optimal reaction conditions .....                                    |  |
| 5.3.1. Type of buffer .....                                                                |  |
| 5.3.2. Temperature of reaction .....                                                       |  |
| 5.3.3. Concentration of NoCAR/EcPPTase .....                                               |  |
| 6. Analytics .....                                                                         |  |
| 6.1. Calibration curves .....                                                              |  |
| 6.2. Chromatogram .....                                                                    |  |
| References .....                                                                           |  |

## 1. Enzymes

The NoCAR and EcPPTase enzymes used in this work are listed in Table S1. The production and purification procedures are described in the experimental section of the main manuscript.

**Table S1:** Enzymes used in this study.

| Entry | Enzyme   | Organism of origin             | Type      | Accession Nr.                 | Size (kDa) | pET system | Ref.  |
|-------|----------|--------------------------------|-----------|-------------------------------|------------|------------|-------|
| 1     | NoCAR    | <i>Nocardia otitiscaviarum</i> | Bacterial | WP_029928026.1 <sup>[1]</sup> | 130.3      | pET151     | [2,3] |
| 2     | EcPPTase | <i>Escherichia coli</i>        | Bacterial | CAQ31055.1 <sup>[4]</sup>     | 23.6       | pET151     | [5-7] |

### 1.1. SDS gel analysis of the purified enzymes

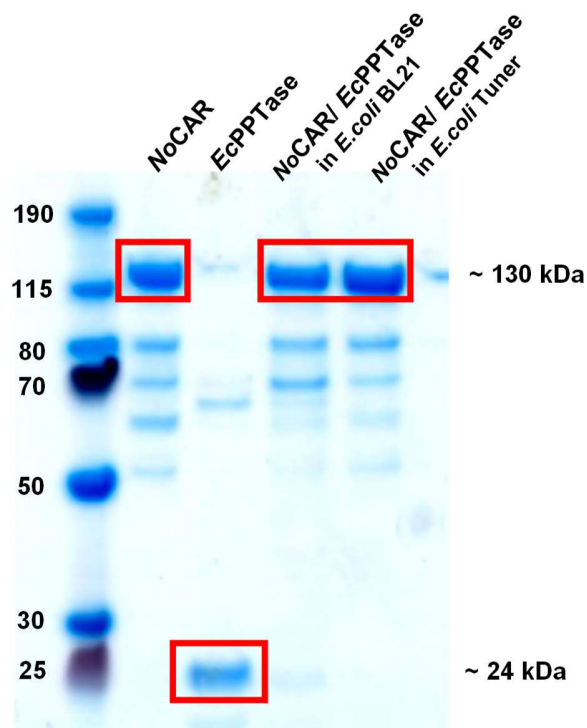

**Figure S1.** SDS gel analysis of the purified enzymes: NoCAR expressed in *E.coli* Tuner, EcPPTase expressed in *E.coli* Tuner, and the co-expressed NoCAR/EcPPTase expressed in *E.coli* BL21 or *E.coli* Tuner. It is important to mention that EcPPTase in the petDuet does not have a His-tag.

## 2. Molecular biology

### 2.1. Vector maps

#### 2.1.1. NoCAR

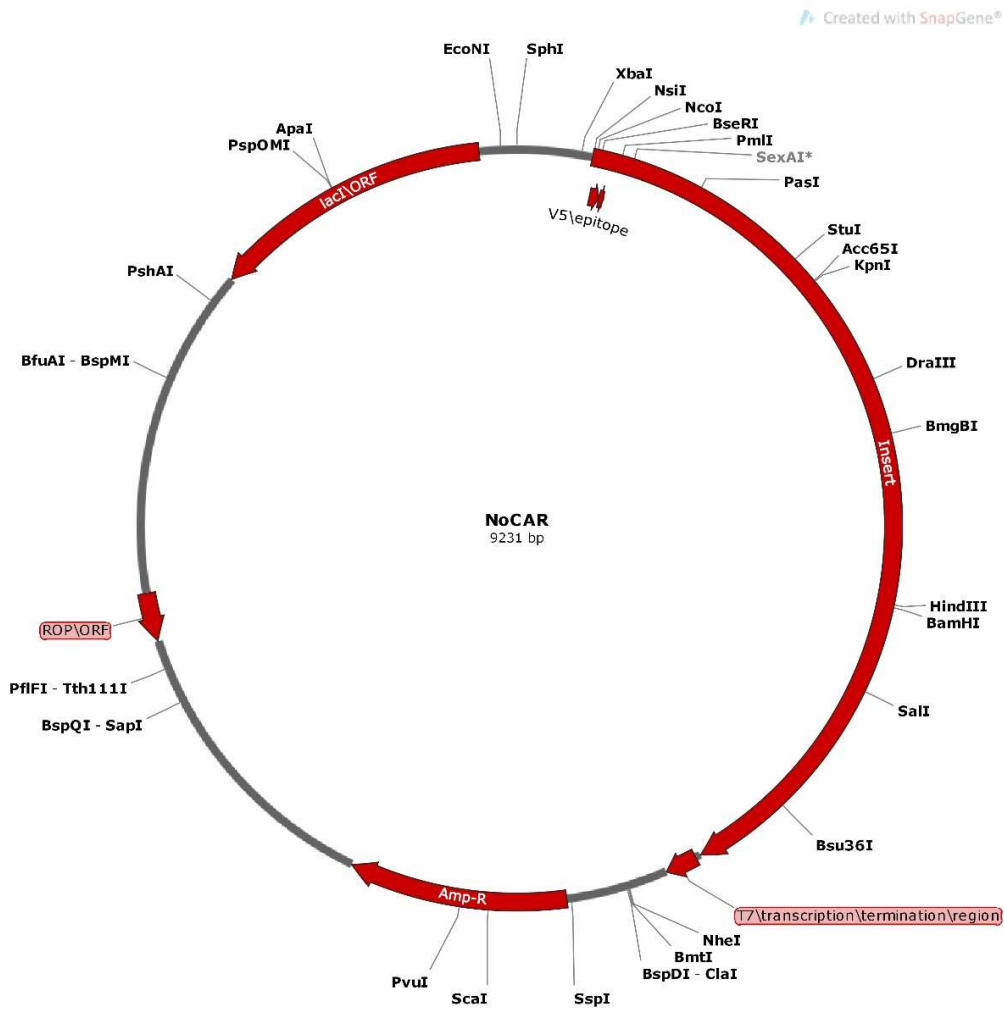

Figure S2. Illustration of the expression vector pET151 harboring the gene of interest coding for NoCAR.

## 2.1.2. *EcPPTase*

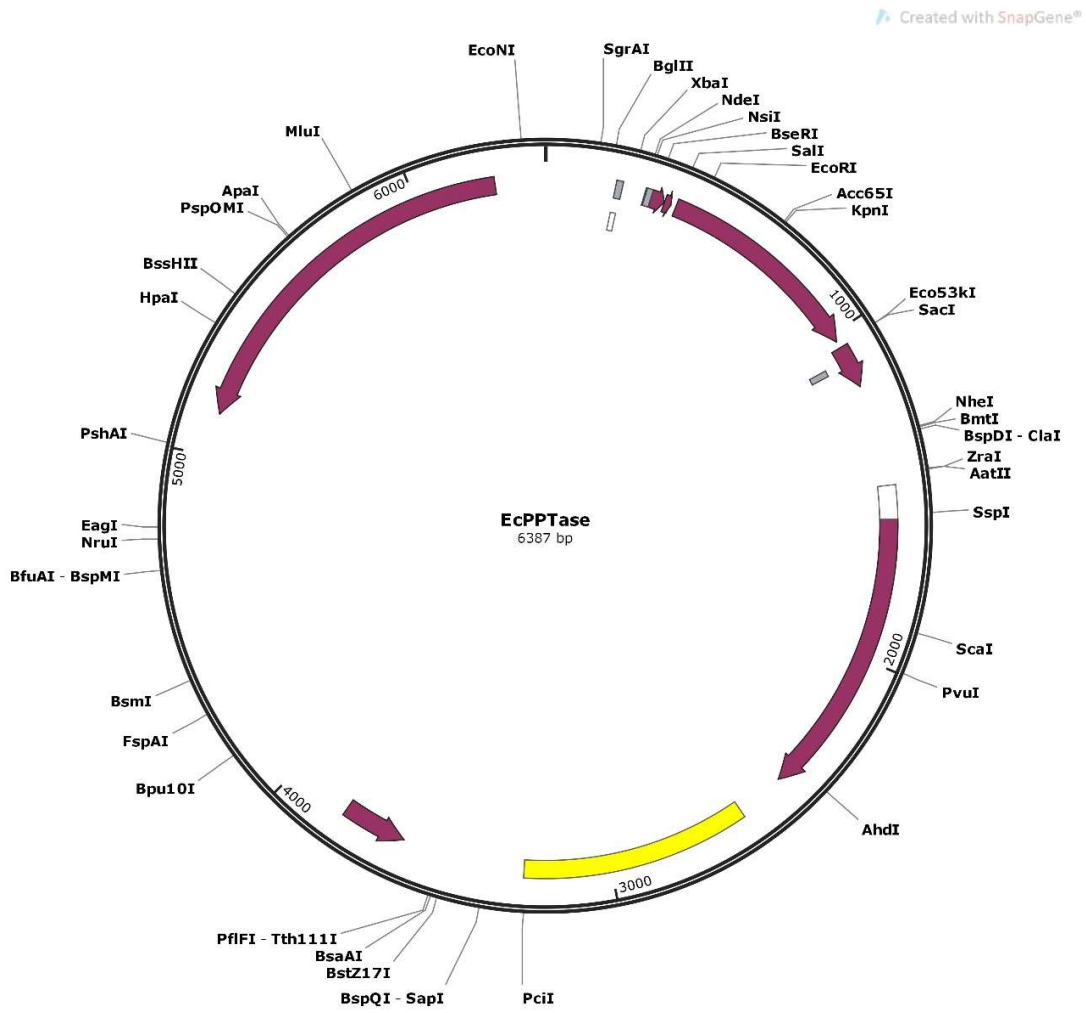

**Figure S3.** Illustration of the expression vector pET151 harboring the gene of interest coding for *EcPPTase*.

### 2.1.3. NoCAR/EcPPTase

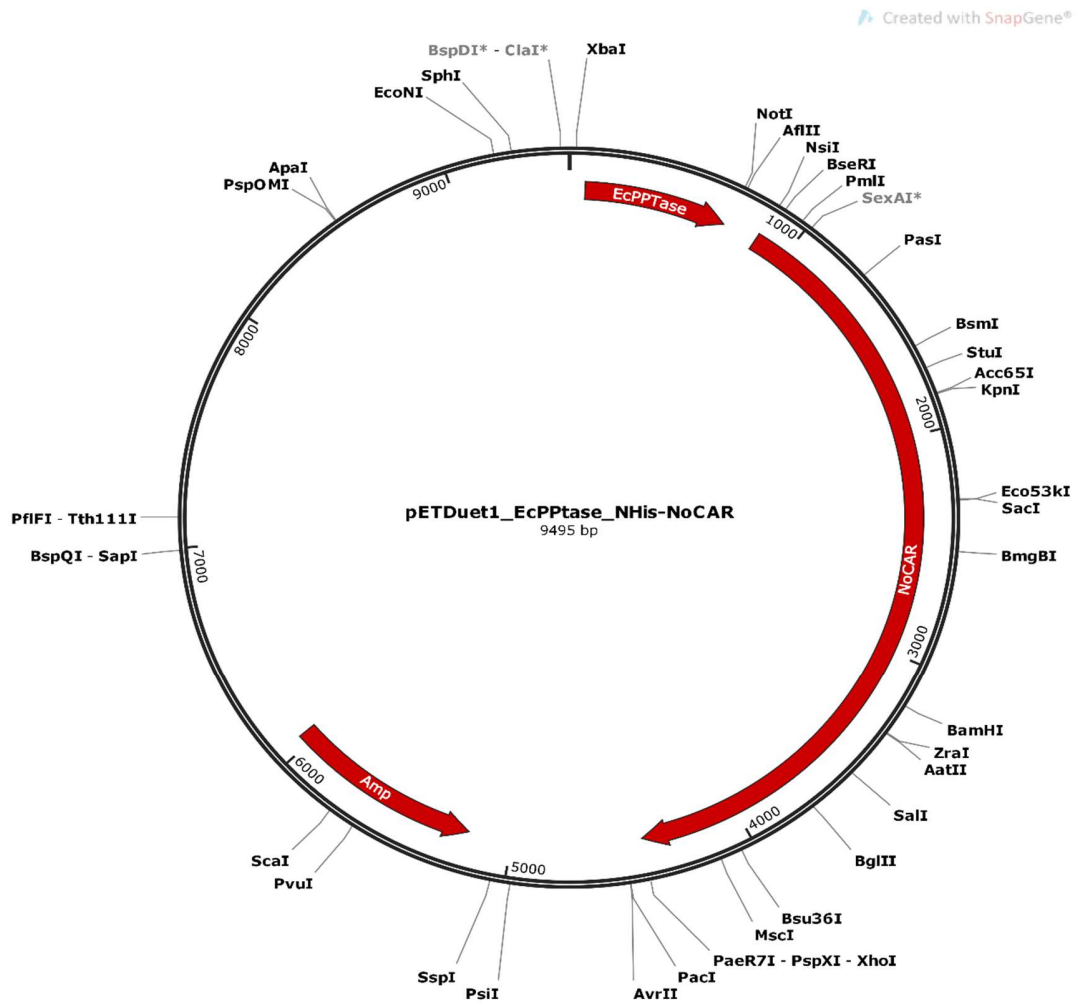

**Figure S4.** Illustration of the expression vector pETDuet harboring the genes of interest coding for NoCAR and EcPPTase.

## 2.2. Gene sequences

**Table S2:** Gene sequences used in this study. Inserts are highlighted in red and/or green.

| Gene         | Sequences                                                                                                                                                                                                                                                                                                                                                                                                                                                                                                                                                                                                                                                                                                                                                                                                                                                                                                                                                                                                                                                                                                                                                                                                                                                                                                                                                                                                                                                                                                                                                                                                                                                                                                                                                                                                                                                                                                                                                                                                                                                                                                                                                                                                                                                                                                                                                                                                                                                                                                                                                                                                                                                                                                                                                                                                                                                                                                                                                                                                                                                                                                                                                                                                                                                                                                                                                                                                                                                                                                                                                                                                                                                                                                                                                                                                                                                                                                                                                                                                                                                                                                                                                                                                                                                                                                              |
|--------------|------------------------------------------------------------------------------------------------------------------------------------------------------------------------------------------------------------------------------------------------------------------------------------------------------------------------------------------------------------------------------------------------------------------------------------------------------------------------------------------------------------------------------------------------------------------------------------------------------------------------------------------------------------------------------------------------------------------------------------------------------------------------------------------------------------------------------------------------------------------------------------------------------------------------------------------------------------------------------------------------------------------------------------------------------------------------------------------------------------------------------------------------------------------------------------------------------------------------------------------------------------------------------------------------------------------------------------------------------------------------------------------------------------------------------------------------------------------------------------------------------------------------------------------------------------------------------------------------------------------------------------------------------------------------------------------------------------------------------------------------------------------------------------------------------------------------------------------------------------------------------------------------------------------------------------------------------------------------------------------------------------------------------------------------------------------------------------------------------------------------------------------------------------------------------------------------------------------------------------------------------------------------------------------------------------------------------------------------------------------------------------------------------------------------------------------------------------------------------------------------------------------------------------------------------------------------------------------------------------------------------------------------------------------------------------------------------------------------------------------------------------------------------------------------------------------------------------------------------------------------------------------------------------------------------------------------------------------------------------------------------------------------------------------------------------------------------------------------------------------------------------------------------------------------------------------------------------------------------------------------------------------------------------------------------------------------------------------------------------------------------------------------------------------------------------------------------------------------------------------------------------------------------------------------------------------------------------------------------------------------------------------------------------------------------------------------------------------------------------------------------------------------------------------------------------------------------------------------------------------------------------------------------------------------------------------------------------------------------------------------------------------------------------------------------------------------------------------------------------------------------------------------------------------------------------------------------------------------------------------------------------------------------------------------------------------------|
| pET151_NoCAR | <p>CAAGGAGATGGCGCCCAACAGTCCCCGGCCACGGGGCCTGCCACCATACCCACGCCGAAA<br/> CAAGCGCTCATGAGCCGAAGTGGCGAGCCGATCTTCCCCATCGGTGATGTCGGCGATATA<br/> GGCGCCAGCAACCGCACCTGTGGCGCCGGTATGCCGGCCACGATGCGTCCGGCGTAGAGG<br/> ATCGAGATCTCGATCCCGCGAAATTAATACGACTCACTATAGGGGAATTGTGAGCGGATAACA<br/> ATTCCCCTCTAGAAATAATTTTGTAACTTTAAGAAGGAGATATACATATGATCATCACCATC<br/> ACCATGGTAAGCCTATCCCTAACCTCTCCTCGGTCTCGATTCTACGAAAACTGTATTTTCA<br/> GGGAATTGATCCCTTACCATGCTGGACGATGCACGTGCCGAACGTCGGGAACGTCGCATTG<br/> CGGACGCCTTAGCGGATGACCAGGTGCTGAAGCAGCCGCAGATGCCGCCGTTTCGGAAAGC<br/> GTCCGCCGTGTCGAAGTTCGCCTCGCTCGTATTGTTGATGCGGTGATGAGTGGCTACGGTGA<br/> CCGTGCCGCTTAGCTTGGCGTCTCCGAACTGGTAGACGGCCGAGTTCCGCTCTGCCC<br/> AATACTCGACCATGACTTATCGTGAGCTGTGGCGTCAAGCGGGTGTGTGGCGGCTGATGG<br/> GGAGCGGATGCCGAAAGCCCTGTTCCGCGCAGAAGATTTTGTGTACCCTGGGTTTTACGAGT<br/> CCGACTACACCGTAGTGGACCTGGCCTTAATGCGTCTGGCCGAGTTGCTGTTCCCTTTCAG<br/> CCGTCTCCCTCAGTTGCTCAGTGGCGCAGCATCATGGCCGAAACTGATCCGCTCTGCCC<br/> GGCGTCCGGCAAACCTGCCTGCCGCCGTGGAGGCTGTTCTGGGCGTTTTGCGCCGCT<br/> CGCGTGTGCTTTGATTATCGCCCTGAACCTTGAGGCACATCGTAGCGCCGTAGATAGCGCT<br/> CGTGAACGCCTGGCAGAAGTGGGTTGCACAGTAGCCACAGTTGCAGATGCCGTGGATCGCGG<br/> CGCTAATCTGCCAGCACCGCTTCGCATTCCAGTGATCGCAACGCTTGGCGTTATTAATTTA<br/> CACGAGCGGATCGACGGGAGCGCCGAAAGGCGCAATGTATACGGATCGTCTGGTCCGAGGC<br/> CTGTGGTTAAGCGCCAATGAGATCCGCGTGCCGGCACTGACCATGAACATATGCCGTTAAGT<br/> CATATTGGGGTTCGATGTCTGTATGGCACCCTGATGCGCGGTGGTACCAGCTACTTTGCT<br/> GCGGCGTCTGACATGTCTACCCTGCTGGACGACTTCGGCTTGGCACGGCCTACTGAGCTGTT<br/> TCTGGTCCCACGCGTGTGTAAGTGTGATCAGCGCTACCAGTCAAGGCTGGATCGCCGGG<br/> TCGTGCCCGGTGAAGATGCGGAGACAGCTGCCACTAACGTTAAAGCGGAACTGCGTGAACGC<br/> GTTCTGGGCGGTGCTTATCTGACAGCGTTGTCTGGTCAAGCCCTTGGCCGCGGAGATGAA<br/> AACGTTTCATGGAATCTCTGCTGGACGATGAACCTCATGACGGCTACGGGTCAACGGAAACGG<br/> GCGGCTCCGACTGCTCGATAATCGCATCAAACGGCCACCGGTGCTTGATTATCGCCTGGTTG<br/> ATGTTCCGGAACCTGGGGTATTTCCGACAGACAAACCACATCCACGGGGTGGAGCTCCTGTTGA<br/> AAACCGAGAGCATGTTCCCGGTTACTACAACGTCGGGAGATCACTGCAGAGATGTTTGACG<br/> CGGATGGCTTCTATCGTACTGGGGATGTCGTGGCGGAACTGGGTCTGAACAGTGGTTTAC<br/> GTGGACCGCCGTAACAACGTTTTAAAGCTGTCACAAGGCGAATTTGTGACTGTGGCGGCTTTA<br/> GAAGCAGTGTATGCCACGTCACCTCTGATTCGGCAGATTTTCGTATATGGGTCCAGCGAACGC<br/> CGTATCTGCTTCCGTTGGTGGTCCGACCGATGCGGTTCTGGCACTGCCGGCCGCTCGCG<br/> CGCGCGGAAAGTGTCTGAAAGCCTCAGCGTATCGCAAAGAACTCGGGGCTCGTCCCTAC<br/> GAGATCCGCGTGTATGATCATCGAAAGCGAGCCCTTACCATTGATAACGGCCTGTTGAGT<br/> GGCATTGGAAGTTACTGCGCCGAAACTGAAAGAGCACTATGGAGAAGCTCTGGAGCAGTT<br/> GTACGCTGAACCGCAACAGCGGGAGGATGAGTTGACTGCGTTGCGCGTGGCCGCTGCCCCAT<br/> GACCGCCGATTCTGGATACGGTTACGCGTGGCGGGTGCAGTTTACGACCTCACGGCAGG<br/> CGAGGTATCGCCGGATGCGCACTTCGCGGATTTGGGTGGGACTCCTTATCTGCCCTGTCCT<br/> TCTCCACGCTGCTGCGCGATATCTTTGGCGTAGAAGTGCCAGTCCGTTTTCATCGTGGGGCC<br/> GCAACTGATCTGGCGCGATTGCTGAATATCTGGTGTCCGAACGCACTCGGGGCTCGCGCCC<br/> AACCGCTGCAACGGTACATGGCGATGATGGTCTGCTGCGCGCTGACGACCTTGGCTGGAAG<br/> CTTTCCTGGATCCGGCAACCTTAGAGCGAGCGGCGCACTTACCAGCGCTCTGGAACCGCCT<br/> CGCACGGTTTTGCTGACGGGTGCGAATGGGTATCTGGGCCGCTTCTGGCCTTGGAGTGGCT<br/> GCAACGCTTGACGTCAGTGGTGGCACACTCATTTGCTTAATCCGCGGTAGCGATGCGGATA<br/> GTGCGCGCCGTCGCTGGATGCTGTTTTCCGCCACCGGTGATCCGGAACCTGAAGCACACTAT<br/> CGCGAACTGGCAGAACGTCGTCTGCGCGTACTGCCGGCGATATCGCGGAACCTAATTTGGG<br/> CCTTCCGCGAGCAAGATTGGCGCGATCTCGCAGAAACGGTGACCTTATCGTGACCCCGGCGGC<br/> CTTGGTTAACCATGTCTTCCCATATGCGCAGTTGTTTTGGTCCGAACGTGGGTACAGCGGA<br/> AGTGATTCTGCTGGCGCTGACCTCCCGTTTTAAACCGGTGACCTACCTGAGCACCGTGGCAGT<br/> CAGCGCGGGGATTGATCCGGAACCTTACCAGAGATGGCGACATTCGTGAGATCTCGCCAG<br/> TCCGCCGCTTGGACGACGGCTACGCTAACGGATATGGTAACAGCAATGGGCCGGAGAAGTG<br/> CTGCTCCGTAATGCGCATGATCGCTTTGGCCTGCCGCTCGCCGTGTTCCGCACTGATATGATT<br/> CTGGCCCATAGCCGTTACGCGGGGAGCTGAATGTCCCGACATGTTTACGCGCCTTCTTCTC<br/> TCAGTGCTCGAACAGGTCTTGCGCCGGCTCTTTTACAGATGCGCATGGCGAACGCCATCG<br/> TGCACACTATGATGGCCTTCGGCAGACTTTACCGCCGCTGCGGTCACTACCTTGGCAGTCCG<br/> GTAACCTCAGGCTAGCAAACTATGATGATTGAATCCGCAATGACGATGCGGATGCGCTCGA<br/> CACCTTTGTGGATTGGCTCATTGAAGCTGGCCACCCGATTGATCGCATTGATGACTATGCCGA<br/> GTGGTTTCGACGCTTCGATACCGCCCTGCGTGCCTTGGCGGAGCACCAACGTCAACACTCCC<br/> TCTGCCCTGTTGACGCGTATCGCGGCCAACCCCTCCATTACATGGAGTGCAGTCCCA<br/> GCTAAGCACTTTCGTGCGGCGTACAACAGCGGAACTGGACCGGATGGTATATCCCGCA<br/> TGTTACCGCGAACTCATCGAGAAGTACGCTCGGATTTACGCTGTTAGGTCTGATTCAGGG</p> |

TTAAAGGGCGAGCTCAGATCCGGCTGCTAACAAAGCCGAAAGGAAGCTGAGTTGGCTGCT  
GCCACCGCTGAGCAATAACTAGCATAACCCCTTGGGCCCTCTAAACGGGCTTTGAGGGGTTTT  
TTGCTGAAAGGAGGAACATATCCGGATATCCCGCAAGAGGCCCGGACGTACCCGGCATAACC  
AAGCCTATGCCTACAGCATCCAGGGTGACGGTGCCGAGGATGACGATGAGCGCATTGTTAGA  
TTTCATACACGGTGCCTGACTGCGTTAGCAATTTAACTGTGATAAACTACCCGATTAAGGCTAG  
CTTATCGATGATAAGCTGCAAAATGAGAATTAATTCTTGAAGACGAAAGGGCCTCGTGATAC  
GCCATTTTTATAGGTTAATGTCATGATAAATGGTTTTCTTAGACGTGAGGTGGCAGCTTTTCGG  
GAAATGTGCGCGGAACCCCTATTTGTTATTTTTCTAAATACATTCAAATATGTATCCGCTCAT  
GAGACAATAACCTGATAAATGCTTCAATAATATTGAAAAAGGAAGAGTATGAGTATTCAACATT  
TCGGTGTGCGCCCTTATCCCTTTTTTTCGGCATTTTTGCCTTCCTGTTTTGCTCACCCGAAAC  
GCTGGTGAAGTAAAAGATGCTGAAGATCAGTTGGGTGCACGAGTGGGTTACATCGAACTGGA  
TCTCAACAGCGGTAAGATCCTTGAGAGTTTTCGCCCCGAAGAACGTTTTCCAATGATGAGCACT  
TTTAAAGTTCTGCTATGTGGCGCGGTTATATCCCGTGTGACGCCGGGCAAGAGCAACTCGGT  
CGCCGCATACACTATTCTCAGAATGACTTGGTTGAGTACTACCAGTACAGAAAGCATCTTA  
CGGATGGCATGACAGTAAGAGAATTATGACGTGCTGCCATAACCATGAGTGATAAACTGCGG  
CCAACCTACTTCTGACAACGATCGGAGGACCGAAGGAGCTAACCCGCTTTTTTGCACAACATGG  
GGGATCATGTAACCTGCGCTTGATCGTTGGGAACCGGAGCTGAATGAAGCCATACCAAACGACG  
ACCGTGACACCACGATGCGTGCAGCAATGGCAACAACGTTGCGCAACAACGTTGCGGCGAAGC  
TACTTACTCTAGCTTCCCGGCAACAATTAATAGACTGGATGGAGGCGGATAAAGTTGCAGGAC  
CACTTCTGCGCTCGGCCCTTCCGGCTGGCTGGTTTTATTGCTGATAAATCTGGAGCCGGTGAGC  
GTGGGTCTCGCGGTATCATTGCAGCACTGGGGCCAGATGGTAAGCCCTCCCGTATCGTAGTT  
ATCTACACGACGGGAGTCAAGCAACTATGGATGAACGAAATAGACAGATTCGCTGAGTAGAGT  
GCCTCACTGATTAAGCATTGGTAACTGTGACACCAAGTTTACTCATATATACTTTAGATTGATTT  
AAAACCTCATTTTTAATTTAAAAGGATCTAGGTGAAGATCCTTTTTGATAATCTCATGACCAAAAT  
CCCTTAACGTGAGTTTTCTTCCACTGAGCGTCAAGCCCGTAGAAAAGATCAAAGGATCTTCT  
TGAGATCCTTTTTTCTGCGCTAATCTGCTGTTGCAAAACAAAAAACCCCGCTACCCAGCGG  
TGGTTTTGTTGCCGGATCAAGAGCTACCAACTCTTTTTCCGAAGGTAACCTGGCTTCAGCAGAG  
CGCAGATACCAAATACTGTCTTCTAGTGTAGCCGTAGTTAGGCCACCACCTCAAGAACTCTGT  
AGCACCGCTACATACCTCGCTCTGCTAATCCTGTTACCAGTGGCTGCTGCCAGTGGCGATAA  
GCTGTCTTACCGGGTGGACTCAAGACGATAGTTACCAGATAAGGCCAGCGGTCGGGTCCGGCT  
GAACGGGGGTTCTGTGCACACAGCCCAGCTTGGAGCGAACGACCTACACCGAACTGAGATAC  
CTACAGCGTGAGCTATGAGAAAGCGCCACGCTTCCCGAAGGGAGAAAGGCCGACAGGTATCC  
GGTAAGCGGCAGGGTCCGAACAGGAGCGCACGAGGGAGCTTCCAGGGGGAAACCGCTG  
GTATCTTTATAGTCTGTCGGGTTTCGCCACCTCTGACTTGAAGCTGATTTTTGTGATGCTCG  
TCAGGGGGGCGGAGCCTATGAAAAACGCCAGCAACGCGGCCTTTTTACGGTTCTCGCCTT  
TTGCTGGCCTTTTGTCCACATGTTCTTCTGCGTTATCCCTGATTCTGTGGATAACCGTATTA  
CCGCTTTGAGTGAGCTGATACCGCTCGCCAGCCGAACGACCGAGCGCAGCGAGTCAATGTA  
GCGAGGAAGCGGAAGAGCGCCTGATGCGGTATTTTCTCCTTACCGATGTTGCGGTATTTTCA  
ACCGCAATGGTGCCTCTCAGTACAATCTGCTCTGATGCCGCATAGTTAAGCCAGTATACACTC  
CGCTATCGCTACGTGACTGGGTATGGCTGCGCCCCGACACCCGCCAACACCCCGCTGACGCG  
CCCTGACGGGCTTGTCTGCTCCCGCATCCGCTTACAGACAAGCTGTGACCGTCTCCGGGAG  
CTGCATGTGTACAGAGTTTTACCGTCAACCGGATCCCGAAACGCGCGAGGCGGTTAAAGCT  
CATCAGCGTGGTGTGAAGCGATTACAGATGTCTGCCTGTTTCCGCGTCCAGCTCGTTGA  
GTTTCTCCAGAAGCGTTAATGTCTGGCTTCTGATAAAGCGGGCCATGTTAAGGGCGGTTTTTTC  
CTGTTTGGTCACTGATGCCCTCCGTGAAGGGGATTTCTGTTTATGGGGTAAATGATACCGAT  
GAAACGAGAGAGGATGCTCACGATACGGGTTACTGATGATGAACATGCCCGTACTGGAAAC  
GTTGTGAGGGTAAACAACCTGGCGGTATGGATGCGGGCGGACCAGAGAAAAATCACTCAGGGT  
CAATGCCAGCGCTTCTGTTAATACAGATGTAGGTGTTCCACAGGGTAGCCAGCAGCATCCTGCG  
ATGACAGATCCGGAACATAATGGTGCAGGGCGCTGACTTCCGCTTTCCAGACTTTACGAAACA  
CGGAAACCGAAGACCAATTCATGTTGTTGCTCAGGTGCGAGACGTTTTGACGACGAGTCCGCT  
CAGGTTGCTCGCTATCGGTGATTCTGCTAACCAGTAAGGCAACCCCGCCAGCCTAGC  
CGGGTCTCAACGACAGGAGCAGCATGCGCACCCCGTGGCCAGGACCAACGCTGCCCG  
AGATGCGCCGCTGCGGCTGCTGGAGATGGCGGACGCGATGGATGTTGTTGCCAAGGTT  
GGTTTTGCGCATTACAGTTTCCGCAAGAATTGATTGGCTCCAATTTGAGTGGTGGTAAATCC  
GTTAGCGAGGTGCCGCCGGCTTCCATTAGGTGCGAGGTGGCCCGGCTCCATGCACCCGCGAC  
GCAACGCGGGGAGGCAGACAAGGTATAGGGCGGGCCTACAATCCATGCCAACCCGTTCCAT  
GTGCTCGCCGAGGCGGCATAAATCGCCGTGACGATCAGCGGTCCAATGAGTGAAGTTAGGCT  
GGTAAGAGCCGCGAGCGATCCTTGAAGCTGTCCCTGATGGTGTGATCTACCTGCCTGGACA  
GCATGGCCTGCAACGCGGGCATCCCGATGCCGCCGGAAGCGAGAAGAATCATAATGGGGAA  
GGCCATCCAGCCTCGCGTCCGGAACGCCAGCAAGACGTAGCCAGCGCGTCCGGCCCGCATG  
CCGGCGATAAATGGCCTGCTTCTCGCCGAAACGTTTTGGTGGCGGGACCAAGTACGAAGGCTTG  
AGCGAGGGCGTGAAGATTCCGAATACCGCAAGCGACAGGCGGATCATGTCGCGCTCCAGC  
GAAAGCGGTCTCGCCGAAAATGACCCAGAGCGCTGCCGGCACCTGTCTACGAGTTGCATG  
ATAAAGAAGACAGTCATAAGTGCGGCGACGATAGTCATGCCCGCGCCACCCGGAAGGAGCT  
GACTGGGTTGAAGGCTCTCAAGGGCATCGGTGAGATCCCGGTGCTTGAATGAGTGAAGTAAAC  
TTACATTAATTGCGTTGCGCTCACTGCCCGCTTTCCAGTCCGGAAACCTGTGCTGCCAGCTGC  
ATTAATGAATCGGCCAACGCGCGGGGAGAGGCGGTTTTGCGTATTGGGCGCCAGGGTGGTTTT  
TCTTTTACCAGTGAGACGGGCAACAGCTGATTGCCCTTACCAGCTGCCCTGAGAGAGTTG  
CAGCAAGCGGTCCACGCTGGTTTTGCCCGCAGCAGGCGAAATCCTGTTTGAATGGTGGTAAACG  
GCGGGATATAACATGAGCTGTCTTCGGTATCGTCTGATCCCACTACCGAGATATCCGCACCA



|                        |                                                                                                                                                                                                                                                                                                                                                                                                                                                                                                                                                                                                                                                                                                                                                                                                                                                                                                                                                                                                                                                                                                                                                                                                                                                                                                                                                                                                                                                                                                                                                                                                                                                                                                                                                                                                                                                                                                                                                                                                                                                                                                                                                                                                                                                                                                                                                                                                                                                                                                                                                                                                                                                                                                                                                                                                                                                                                                                                                                                                                                                                                                                                                                                                                                                                                                                                                                                                                                                     |
|------------------------|-----------------------------------------------------------------------------------------------------------------------------------------------------------------------------------------------------------------------------------------------------------------------------------------------------------------------------------------------------------------------------------------------------------------------------------------------------------------------------------------------------------------------------------------------------------------------------------------------------------------------------------------------------------------------------------------------------------------------------------------------------------------------------------------------------------------------------------------------------------------------------------------------------------------------------------------------------------------------------------------------------------------------------------------------------------------------------------------------------------------------------------------------------------------------------------------------------------------------------------------------------------------------------------------------------------------------------------------------------------------------------------------------------------------------------------------------------------------------------------------------------------------------------------------------------------------------------------------------------------------------------------------------------------------------------------------------------------------------------------------------------------------------------------------------------------------------------------------------------------------------------------------------------------------------------------------------------------------------------------------------------------------------------------------------------------------------------------------------------------------------------------------------------------------------------------------------------------------------------------------------------------------------------------------------------------------------------------------------------------------------------------------------------------------------------------------------------------------------------------------------------------------------------------------------------------------------------------------------------------------------------------------------------------------------------------------------------------------------------------------------------------------------------------------------------------------------------------------------------------------------------------------------------------------------------------------------------------------------------------------------------------------------------------------------------------------------------------------------------------------------------------------------------------------------------------------------------------------------------------------------------------------------------------------------------------------------------------------------------------------------------------------------------------------------------------------------------|
|                        | <p>CGCGCAGCCCGGACTCGGTAATGGCGCGCATTGCGCCCAGCGCCATCTGATCGTTGGCAACC<br/> AGCATCGCAGTGGGAACGATGCCCTCATTGATGTTGTTGAAAACCGGACATG<br/> GCACTCCAGTCGCCTTCCCGTTCCGCTATCGGCTGAATTTGATTGCGAGTGAGATATTTATGC<br/> CAGCCAGCCAGACGCAGACGCGCCGAGACAGAAGTAAATGGGCCCGCTAACAGCGCGATTTG<br/> CTGGTGACCCAATGCGACCAGATGCTCCACGCCAGTCGCGTACCGTCTTCATGGGAGAAAA<br/> TAATACTGTTGATGGGTGCTGGTCAGAGACATCAAGAAAATAACGCCGGAACATTAGTGCAGG<br/> CAGCTTCCACAGCAATGGCATCCTGGTCATCCAGCGGATAGTTAATGATCAGCCCAGTACGCG<br/> GTTGCGCGAGAAGATTGTGCACCGCCGCTTACAGGCTTCGACGCGCGTTCGTTTACCATCGA<br/> CACCACCAGCTGGCACCAGTTGATCGGCGCGAGATTAATCGCCGCGACAATTTGCGACG<br/> GCGCGTGCAGGGCCAGACTGGAGGTGGCAACGCCAATCAGCAACGACTGTTTCCCCGCCAG<br/> TTGTTGTGCCACGCGGTTGGGAATGTAATCAGCTCCGCCATCGCCGCTTCCACTTTTTCCCG<br/> CGTTTTCGCAGAAACGTGGCTGGCCTGGTTCACCACGCGGAAACGGTCTGATAAGAGACAC<br/> CGGCATACTCTGCGACATCGTATAACGTTACTGGTTTACATTACCACCCTGAATTGACTCTC<br/> TTCCGGGCGCTATCATGCCATACCGCGAAAGGTTTTGCGCCATTGATGGTTCGGGATCTC<br/> GACGCTCTCCCTTATGCGACTCCTGCATTAGGAAGCAGCCAGTAGTAGGTTGAGGCCGTTGA<br/> GCACCGCCGCGCAAGGAATGGTGCATG</p>                                                                                                                                                                                                                                                                                                                                                                                                                                                                                                                                                                                                                                                                                                                                                                                                                                                                                                                                                                                                                                                                                                                                                                                                                                                                                                                                                                                                                                                                                                                                                                                                                                                                                                                                                                                                                                                                                                                                                                                                                                                                                                                                                                                                                                                                                                                                                                     |
| <p>pET151_EcPPTase</p> | <p>CAAGGAGATGGCGCCAACAGTCCCCGGCCACGGGGCCTGCCACCATACCCACGCCGAAACAAGCGCT<br/> CATGAGCCCGAAGTGGCGAGCCCGATCTTCCCATCGGTGATGTCGGCGATATAGGCGCCAGCAACCGC<br/> ACCTGTGGCGCCGGTGTGCCGCGCACGATGCGTCCGGCGTAGAGGATCGAGATCTCGATCCCGCGAAA<br/> TTAATACGACTCACTATAGGGGAATTGTAGCGGATAACAATCCCCTAGAAAATATTTTGTTAACTT<br/> TAAGAAGGAGATACATATGCATCATCACCATCACCATTGGTAAGCCTATCCCTAACCTTCTCGGTCT<br/> CGATTCTACGGAACCTGTATTTTCAGGGAATTGATCCCTTACCATGGTTCGACATGAAAACCCACATA<br/> CCTCTCTTCCGTTTGTGGGCATACGCTGCACCTCGTGAATTGATCCGCAATTTCTGCGAACAGGAT<br/> CTGTTGTGGTTACCGCACTATGCACAGCTGCAGCATGCGGGTTCGAAACGCCAAACGGAACATCTGGCT<br/> GGTCGTATTGCCGAGTGTATGCGCTGCGCGAGTATGGCTACAAATGCGTACCAGCCATTGGCGAACTG<br/> CGTCAACCCGTTTGGCCAGCGGAAGGTACGCGGAGCATTTCCATTGTTGTTACCACAGCACTTTCGGGTAG<br/> TTAGTCGTACGCCGATTGGCATCGACATTGAGGAAATCTTACGCGTTCAAACAGCTCGGGAATTGACCGA<br/> TAACATCATTACCCTGCGGAACACGAGCGCTTAGCCGATTGTGGACTGGCCTTTTACCTGGCAGTACTC<br/> TCGCGTTTAGTGCAGAAAGAAAGCGCCTTAAAGCGTCGGAATTCAGACGGATGCTGGCTTCTGACTA<br/> CCAGATTATCTCGTGAACAAACAGCAAGTCATCATTACCAGCGAAGTATGAGATGTTTGCAGTCCATTGG<br/> CAGATCAAGGAAAAGATTGTGATCACTCTGTGCCAACAGATTAAAGGGCGAGCTCAGATCCGGCTGC<br/> TAACAAAGCCGAAAGGAAGCTGAGTTGGCTGCTGCCACCGTGAAGCAATAACTAGCATAACCCCTTGG<br/> GGCCTTAACCGGTCTTGGGGTTTTTGTGAAAGGAGGAACTATATCCGGATATCCCGCAAGAGG<br/> CCCAGTACCGGCATAACCAAGCCTATGCCTACAGCATCCAGGGTACCGGTGCCGAGGATGACGATG<br/> AGCGCATTGTTAGATTCATACACGGTGCCTGACTGCGTTAGCAATTTAACTGTGATAAACTACCGCATT<br/> AAGCTAGCTTATCGATGATAAGCTGTCAAACATGAGAATTAATCTTGAAGACGAAAGGGCCTCGTGATA<br/> CGCCTATTTTATAGGTTAATGTCATGATAATAATGGTTTCTTAGACGTGAGTGGCACTTTTCCGGGAAA<br/> TGTGCGCGAACCCTATTTGTTATTTTCAAATACATTCAAATATGATCCGCTCATGAGACAATAACC<br/> CTGATAAATGCTTCAATAATATTGAAAAGGAAGATGATGAGTATTCAACATTTCCGTGTCGCTTATTC<br/> CCTTTTTGCGGCATTTTGCCTTCTGTTTTTGTCAACAGAAACGCTGGTGAAGTAAAGATGCTGAA<br/> GATCAGTTGGGTGCACGAGTGGGTTACATCGAACTGGATCTCAACAGCGGTAAGATCCTTGAGAGTTTT<br/> GCCCGAAGAACGTTTTCCAATGATGAGCACTTTAAAGTTCTGCTATGTGGCGGGTATTATCCCGTGT<br/> GACGCCGGCAAGAGCAACTCGGTCGCCGATACACTATTCTCAGAATGACTTGGTTGAGTACTCACCAG<br/> TCACAGAAAAGCATCTTACGGATGGCATGACAGTAAGAGAATTATGAGTGTGCCATTAACCATGAGTG<br/> ATAACTGCGGCCAACTTACTTCTGACAACGATCGGAGGACCGAAGGAGCTAACCGCTTTTTTGCACAA<br/> CATGGGGGATCATGTAATCGCCTTATCGTTGGGAACCGGAGCTGAATGAAGCCATACCAAACGACGA<br/> GCGTGACACCAGATGCCTGCAGCAATGGCAACAACGTTGCGCAACTATAACTGGCGAACTACTTACT<br/> CTAGCTTCCCGCAACAATTAATAGACTGGATGGAGGCGGATAAAGTTGACAGGACCACTTCTGCGCTCG<br/> GCCCTTCCGGCTGGCTGTTTTATTGCTGATAAATCTGGAGCCGGTGGAGCTGGGTCTCGCGGTATCATTG<br/> CAGCACTGGGGCCAGATGGTAAGCCCTCCCGTATCGTAGTTATCTACACGACGGGAGTCAAGCAACTA<br/> TGGATGAACGAAATAGACAGATCGCTGAGATAGTGCCTCACTGATTAAGCATTGGTAAGTGTGAGACC<br/> AAGTTTACTCATATATACTTATAGATTGATTTAAACTTCATTTTTAATTTAAAGGATCTAGGTGAAGATCC<br/> TTTTGATAATCTCATGACCAAAATCCCTAACGTGAGTTTTCGTCCACTGAGCGTCAGACCCCGTAGAA<br/> AAGATCAAAGGATCTTCTGAGATCCTTTTTTCTGCGCGTAATCTGCTGTTGCAAAACAAAAAACCACC<br/> GCTACCAGCGGTGGTTTTGTTGCGGGATCAAGAGCTACCAACTCTTTTTCCGAAGGTAAGTGGCTTACG<br/> AGAGCGCAGATACCAAACTGTCTTCTAGTGTAGCCGATGTTAGGCCACCACTTCAAGAACTCTGTAG<br/> CACCCTACATACCTCGCTCTGTAATCTGTTACCAGTGGCTGCTGCCAGTGGCGATAAAGTGGTCTT<br/> ACCGGTTGGACTCAAGACGATAGTACCAGATAAGGCGCAGCGGTGCGGGTGAACGGGGGGTTCGTG<br/> CACACAGCCAGCTTGGAGCGAACGACCTACCCGAAGTACGATACCTACAGCGTGAAGTATGAGAAAG<br/> CGCCACGCTTCCGAAGGGAGAAAGGCGGACAGGTATCCGGTAAGCGGCAGGGTCCGAACAGGAGAG<br/> CGCAGGAGGAGCTTCCAGGGGAAACGCTGGTATCTTATAGTCTGTCGGGTTTCCACCTCTGAC</p> |

|                                            |                                                                                                                                                                                                                                                                                                                                                                                                                                                                                                                                                                                                                                                                                                                                                                                                                                                                                                                                                                                                                                                                                                                                                                                                                                                                                                                                                                                                                                                                                                                                                                                                                                                                                                                                                                                                                                                                                                                                                                                                                                                                                                                                                                                                                                                                                                                                                                                                                                                                                                                                                                                                                                                                                                                                                                                                                                                                                                                                                                                                                                                                                                                                                                                                                                                                                                                                                                                                                                                                                                                                                                                      |
|--------------------------------------------|--------------------------------------------------------------------------------------------------------------------------------------------------------------------------------------------------------------------------------------------------------------------------------------------------------------------------------------------------------------------------------------------------------------------------------------------------------------------------------------------------------------------------------------------------------------------------------------------------------------------------------------------------------------------------------------------------------------------------------------------------------------------------------------------------------------------------------------------------------------------------------------------------------------------------------------------------------------------------------------------------------------------------------------------------------------------------------------------------------------------------------------------------------------------------------------------------------------------------------------------------------------------------------------------------------------------------------------------------------------------------------------------------------------------------------------------------------------------------------------------------------------------------------------------------------------------------------------------------------------------------------------------------------------------------------------------------------------------------------------------------------------------------------------------------------------------------------------------------------------------------------------------------------------------------------------------------------------------------------------------------------------------------------------------------------------------------------------------------------------------------------------------------------------------------------------------------------------------------------------------------------------------------------------------------------------------------------------------------------------------------------------------------------------------------------------------------------------------------------------------------------------------------------------------------------------------------------------------------------------------------------------------------------------------------------------------------------------------------------------------------------------------------------------------------------------------------------------------------------------------------------------------------------------------------------------------------------------------------------------------------------------------------------------------------------------------------------------------------------------------------------------------------------------------------------------------------------------------------------------------------------------------------------------------------------------------------------------------------------------------------------------------------------------------------------------------------------------------------------------------------------------------------------------------------------------------------------------|
|                                            | <p>TTGAGCGTCGATTTTTGTGATGCTCGTCAGGGGGGCGGAGCCTATGGAAAAACGCCAGCAACGCGGCCT<br/> TTTTACGGTTCCTGGCCTTTTGTGGCCTTTTGTCTACATGTTCTTTCTGCGTTATCCCTGATTCTGTGGA<br/> TAACCGTATTACCGCCTTTGAGTGAGCTGATACCGCTCGCCGAGCCGAACGACCGAGCGCAGCGAGTC<br/> AGTGAGCGAGGAAGCGGAAGAGCGCCTGATGCGGTATTTTCTCTTACGCATCTGTGCGGTATTTACAC<br/> CGCAATGGTGCACCTCTCAGTACAATCTGCTCTGATGCCGCATAGTTAAGCCAGTATACACTCCGCTATCGC<br/> TACGTGACTGGGTCATGGCTGCGCCCCACACCCGCCAACACCCGCTGACGCGCCCTGACGGGCTTGCT<br/> GCTCCCGCATCCGCTTACAGACAAGCTGTGACCGTCTCCGGGAGCTGCATGTGTGACAGGTTTTACCCG<br/> TCATCACCGAAACGCGGAGGCAGCTGCGGTAAGCTCATCAGCGTGGTCTGAAGCGATTACAGATG<br/> TCTGCCTGTTATCCGCTCCAGCTCGTTGAGTTTCTCCAGAAGCGTTAATGTCTGGCTTCTGATAAAGCG<br/> GGCCATGTTAAGGGCGGTTTTTCTGTTTGGTCACTGATGCCTCCGTGTAAGGGGGATTCTGTTCATG<br/> GGGGTAATGATACCGATGAAACGAGAGAGGATGCTCACGATACGGGTTACTGATGATGAACATGCCCCG<br/> GTTACTGGAACGTTGTGAGGGTAAACAAGTGGCGGTATGGATGCGGCGGGACCAGAGAAAAATCACTC<br/> AGGGTCAATGCCAGCGCTTCGTTAATACAGATGTAGGTGTTCCACAGGGTAGCCAGCAGCATCTCGCA<br/> TGCAGATCCGGAACATAATGGTGCAGGGCGCTGACTCCGCGTTTCCAGACTTACGAAACACGGAAC<br/> CGAAGACCATTATGTTGTTGCTCAGGTCGACAGCCTTTTGCAGCAGCATCGCTTACAGTTCCGCTCGCG<br/> TATCGGTGATTCACTGCTAACCAGTAAGGCAACCCCGCCAGCCTAGCCGGTCTCAACGACAGGAGC<br/> ACGATCATGCGCACCCGTGGCCAGGACCAACGCTGCCCGAGATGCGCCGCGTGGCGTCTGGAGATG<br/> GCGGACGCGATGGATATGTTCTGCCAAGGGTTGGTTTGCATTACAGTTCTCCGCAAGAATTGATTGG<br/> CTCCAATTCTGGAGTGGTGAATCCGTTAGCGAGGTGCCGCGGCTTCCATTAGGTGAGGTGGCCCCG<br/> GCTCCATGCACCGCAGCAACGCGGGGAGGCAGACAAGGTATAGGGCGGCGCCTACAATCCATGCCA<br/> ACCCGTTCCATGTGCTCGCCGAGGCGGCATAAATCGCCGTGACGATCAGCGGTCCAATGATCGAAGTTA<br/> GGCTGGTAAGAGCCGCGAGCGATCCTTGAAGCTGTCCCTGATGGTCTCATCTACCTGACCTGGACAGCAT<br/> GGCCTGCAACGCGGGCATCCGATGCCCGGAAGCGAGAAGAATCATAATGGGAAAGCCCATCCAGC<br/> CTCGCTCGCGAACGCCAGCAAGACGTAGCCAGCGCTCGGCCGCTGACCGGCGATAATGGCCTGCT<br/> TCTCGCGAAACGTTTGGTGGCGGGACCAGTGACGAAGGCTTGGAGCGAGGGCGTGCAAGATCCGAAT<br/> ACCGCAAGCGACAGGCCGATCATCGTCGCGCTCCAGCGAAAGCGGTCTCGCCGAAATGACCCAGAGC<br/> GCTGCCGCGACCTGCTCTACGAGTTGCATGATAAAGAAGACAGTCATAAGTGGCGGCGACGATAGTCATG<br/> CCCCGCGCCACCGGAAGGAGCTGACTGGGTTGAAGGCTCTCAAGGGCATTGCTGCGAGATCCCGGTGCC<br/> TAATGAGTGAGCTAACTTACATTAATTGCGTTGCGCTCACTGCCCGCTTCCAGTCCGGAAACCTGTCGTG<br/> CCAGCTGCATTAATGAATCGGCCAACGCGCGGGGAGAGGCGGTTTGGCTATTGGGCGCCAGGGTGGTTT<br/> TTCTTTTACCAGTGAGACGGCAACAGCTGATTGCCCTTACCAGCTGGCCCTGAGAGAGTTGCAGCAA<br/> GCGGTCACGCTGGTTTGCAGCAGGGCAAAATCTGTTTATGGTGTGTTTACGCGGGATATAACA<br/> TGAGCTGCTTTCGGTATCGTCTATCCCACTACCGAGATATCCGCACCAACGCGCAGCCCGGACTCGGTA<br/> ATGGCGCGCATTGCGCCAGCGCCATCTGATCGTTGGCAACCAGCATCGCAGTGGGAACGATGCCCTCA<br/> TTCAGCATTGTCATGGTTTGTGAAAACCGGACATGGCACTCCAGTCCGCTTCCCGTTCCGCTATCGGCTG<br/> AATTTGATTGCGAGTGAGATATTTATGCCAGCCAGCCAGACGCGAGACGCGCCGAGACAGAACTTAATGG<br/> GCCCCGTAACAGCGCATTTGCTGGTGACCAATGCGACCCAGATGCTCCACGCCAGTCCGCTACCGTCT<br/> TCATGGGAGAAAATAACTGTTGATGGGTGTCTGGTCCAGAGACATCAAGAAATAACGCCGGAACATTA<br/> GTGCAGGCAGCTTCCACAGCAATGGCATCTGGTCCATCCAGCGGATAGTTAATGATCAGCCACTGACGC<br/> GTTGCGCGAGAAGATTGTGACCCGCGCTTACAGGCTTCCAGCGCCTTCTGTTTACCATCGACACCAC<br/> CAGCTGGCACCCAGTTGATCGGCGCGAGATTTAATCGCCGCGACAATTTGCGAGCGCGCTGAGGGC<br/> CAGACTGGAGGTGGCAACGCCAATCAGCAACGACTGTTTCCCGCCAGTGTGTTGCGCCAGCGGTTGGG<br/> AATGTAATTAGCTCCGCATCGCGCTTCCACTTTTTCCCGCTTTTCCGAGAAACGTTGGCTGGCCTGGT<br/> TCACCAGCGGGAAACGGTCTGATAAGAGACACCGGCATACTCTGCGACATCGTATAACGTTACTGGTTT<br/> CACATTACCACCCTGAATTGACTCTCTCCGGGCGCTATCATGCCATACCGGAAAGGTTTTGCGCCATT<br/> CGATGGTGTCCGGATCTCGACGCTCTCCTTATGCGACTCTGCAATTAGGAAGCAGCCAGTAGTAGGT<br/> TGAGGCCGTTGAGCACCGCCGCGCAAGGAATGGTGCATG</p> |
| <p>pETDuet_NoCAR/<br/> <i>Ec</i>PPTase</p> | <p>GGGGAATTGTGAGCGGATAACAATTCCTCTAGAAATAATTTGTTTAACTTTAAGAAGGAGA<br/> TATACCATGGTGCATATGAAAACCTACGCATACCTCCCTCCCTTTGCGCGACATACGCTGCATT<br/> TTGTTGAGTTCGATCCGGCGAATTTTTGTGAGCAGGATTTACTCTGGCTGCCGCACTACGCAC<br/> AACTGCAACACGCTGGACGTAACGTAACAGAGCATTAGCCGGACGGATCGCTGCTGTTT<br/> ATGCTTTGCGGGAAATATGGCTATAAATGTGTGCCCGCAATCGGCGAGCTACGCCAACCTGTCT<br/> GGCCTGCGGAGGTATACGGCAGTATTAGCCACTGTGGGACTACGGCATTAGCCGTGGTATCT<br/> CGTCAACCGATTGGCATTGATATAGAAGAAATTTTTCTGTACAACCGCAAGAGAATTGACAG<br/> ACAACATTATTACACCAGCGGAACACGAGCGACTCGCAGACTGCGGTTTAGCCTTTTTCTGCG<br/> CGCTGACACTGGCATTTTCCGCCAAAGAGAGCGCATTAAAGGCAAGTGAGATCCAAACTGATG<br/> CAGGTTTTCTGGACTATCAGATAATTAGCTGGAATAAACAGCAGGTCATCATTATCGTGAGAA<br/> TGAGATGTTTGTGTCAGTGGCAGATAAAAAGAAAAGATAGTCATAACGCTGTGCCAACACGA<br/> TTAAGCTTGGCGCCGATAATGCTTAAGTCGAACAGAAAGTAATCGTATTGTACACGGCCGCA<br/> TAATCGAAATTAATACGACTCACTATAGGGGAATTGTGAGCGGATAACAATTCCTTCTTAGT</p>                                                                                                                                                                                                                                                                                                                                                                                                                                                                                                                                                                                                                                                                                                                                                                                                                                                                                                                                                                                                                                                                                                                                                                                                                                                                                                                                                                                                                                                                                                                                                                                                                                                                                                                                                                                                                                                                                                                                                                                                                                                                                                                                                                                                                                                                                                                                                                                                                                                                                                                                                                                                                                                            |

ATATTAGTTAAGTATAAGAAGGAGATATACATATGCATCATACCATACCATGGTAAGCCTATC  
CCTAACCCCTCCTCGGTCTCGATTCTACGGAAAACTGTATTTTCAGGAATTGATCCCTTCA  
CCATGCTGGACGATGCACGTGCCGAACGTCGGGAACGTCGCATTGCGGACGCCTTAGCGGAT  
GACCAGGTTCTGTAAGCAGCCGAGATGCCGCCGTTTCGGAAAGCGTCCGCCGTGTCGAAAT  
TCGCCCTCGCTCGTATTGTTGATGCGGTGATGAGTGGCTACGGTGACCGTCCGCCGTTAGCTT  
GGCGTCGTTCCGAACTGGTAGACGGCCAGTTCGCCTCCTGCCGAATACTCGACCATGACT  
TATCGTGAGCTGTGGCGTCAAGCGGGTGTGTGGCGGCTGAATGGGGAGCGGATGCCGAAA  
GCCCTGTTCCGCGCAGAAGATTTTGTGTGTACCCTGGGTTTTACGAGTCCGGACTACACCGTAG  
TGGACCTGGCCTTAATGCGTCTGGCCGAGTTGCTGTTCCCTTCAGGCCGTCTGCCTCAGTTG  
CTCAGTGGCGCAGCATATGGCCGAAACTGAACCGCGTATGCTTGGCGGTCCGCCGAAACC  
CTGCCTGCCGCCGTGGAGGCTGTTCTGGGCGGTTTTGCGCCGCGTCCGCTGCTGGTCTTTGA  
TTATCGCCCTGAACTTGAGGCACATCGTAGCGCCGTAGATAGCGCTCGTGAACGCCTGGCAG  
AAGTGGGTTGCACAGTAGCCACAGTTGCAGATGCCGTGGATCGCGGCGCTAATCTGCCAGCA  
CGCTTTCGATTCCAGTGATCGCGAACGCTTGGCGTTATTAATTTACACGAGCGGATCGACG  
GGAGCGCCGAAAGGCGCAATGTATACGGATCGTCTGGTCCGACGGCCTGTGGTTAAGCGCCAA  
TGAGATCCGCGTGCAGGACTGACCATGAACTATATGCCGTTAAGTCATATTGCCGGTCCGAT  
GTCTCTGTATGGCACCTGATGCGCGGTGGTACCAGCTACTTTGTGCGGGCTCTGACATGT  
CTACCCTGCTGGACGACTTCGGCTTGGCAGGGCTACTGAGCTGTTTCTGGTCCGCGTGTG  
TGTGAACTGCTGCATCAGCGCTACCAGTCAAGGCTGGATCGCCGGGTGCTCGCCGGTGAAGA  
TGCGGAGACAGCTGCCACTAACGTTAAAGCGGAACTGCGTGAACGCGTTCTGGGCGGTGCT  
ATCTGACAGCGTTGCTGGGTGACCCCTCTGGCCGCGGAGATGAAAACGTTTACGGAATCTC  
TGCTGGACGATGAACTTATGACGGCTACGGGTCAACGGAAGCGGGCGGCTCCGTCGCTC  
GATAATCGCATCAAACGGCCACCGGTGCTTATTATCGCCTGGTTGATGTTCCGGAAGTGGGG  
TATTTCCGACAGACAAACACATCCACGGGGTGAAGCTCCTGTTGAAAACCGAGAGCATGTTCC  
CCCGGTTACTACAAACGTCGGGAGATCACTGCAGAGATGTTTGACGCGGATGGCTTCTATCGT  
ACTGGGATGTCGTGGCGGAACTGGTCCCTGAACAGCTGGTTTACGTGGACCGCCGTAACAA  
CGTTTTAAAGCTGTCAAGGCGAATTTGTGACTGTGGCGGCTTTAGAAGCAGTGTATGCCAC  
GTCACCTCTGATTCGGCAGATTTTCGTATATGGGTCCAGCGAACGCGCGTATCTGCTTGCCT  
GGTCGTGCCGACCGATGCGGTTCTGGCACTGCCGGCCGCTCGCGCGCGCGCGGAAGTGTCT  
GAAAGCCTGCAGCGTATCGCAAAGAATCGGGGCTGCGTCCCTACGAGATTCGCGCTGATCT  
GATCATCGAAAGCGAGCCCTTACCATTGATAACGGCCTGTTGAGTGGCATTGGAAGTACT  
GCGCCCGAAACTGAAAGAGCACTATGGAGAAGCTCTGGAGCAGTTGTACGCTGAACTCGCCG  
AACAGCGGGAGGATGAGTTGACTGCGTTGCGCCGTGGCGCCCATGACCGCCCGATTCTGGAT  
ACGTTACGCGGTGCGCGGGTGCAGTGTAGACCTCACGGCAGGCGGATCGCCGATCGCCGATG  
CGCACTTCGCGGATTTGGGTGGGACTCCTTATCTGCCCTGTCTTCTCCACGCTGCTGCGC  
GATATCTTTGGCGTAGAAGTGCCAGTCCGTTTCATCGTGGGGCCGGCAACTGATCTGGCGCG  
CATTGCTGAATATCTGGTTCGGAACGCGACTCGGGGTGCGGCCAACCGCTGCAACGGTAC  
ATGGCGATGATGGTCTGCGCGCTGACGACCTTGGCGTGGAGCTTTCGCTGGAAGCTCCGCA  
ACCTTAGACGCGAGCGCGCACTTACCCAGCGCTCTGGAACCGCCTCGCACGGTTTTGCTGAC  
GGGTGCGAATGGGTATCTGGGCCGCTTTCTGGCCTTGGAGTGGCTGCAACGGCTTACGCTCA  
GTGGTGGCACACTCATTGCTTAATCCGCGGTAGCGATGCGGATAGTGCAGCGCGTGCCTG  
GATGCTGTTTTCGCCACCGGTGATCCGGAACCTCGAACACACTATCCGGAACGCGAGAACT  
CGTCTGCGCGTACTGCCGGCGATATCGGCGAACCTAATTTGGCCCTTCGCGAGCAAGATTG  
GCCGATCTCGCAGAAACGGTGCACCTTATCGTGCACCCGGCGGCCCTGGTTAACCATGTCTT  
GCCATATGCGCAGTTGTTGGTCCGAACGTGGTGGGTACAGCGGAAGTATTGCTGCTGGCGC  
TGACCTCCCGTTTTAAACCGGTGACCTACCTGACCGGTGGCAGTCCGCAACTGGCGGATGAT  
CCGGAACCTTTACCGAAGATGGCGACATTGCTGAGATCTCGCCAGTCCGCCGCTTGGACGA  
CGGCTACGCTAACGGATATGGTAACAGCAAAATGGGCCGGAGAAGTGTCTGCTCCGTAATGCGC  
ATGATCGCTTTGGCCTGCCGGTCCCGTGTTCGCGAGTGTATGATTCTGGCCATAGCCGTT  
ACGCGGGGCGAGCTGAATGTCCCGACATGTTTACGCGCCTTCTTCTCAGTGCTCGCAACAG  
GTCTTGGCCGGGCTTTTTACGATGCGCATGGCGAACGCCATCGTGCACACTATGATGGC  
CTTCCGGCAGACTTTACCGCCGCTGCGGTCACTACCCTTGGCAGTCCGCTAACCTCAGGCTA  
CGAAACCTATGATGATTGAATCCGATGACGATGGGATCAGCCTCGACACCTTTGTGGATTG  
GCTCATTGAAGCTGGCCACCCGATTGATCGCATTGATGACTATGCCGAGGGTTGCGACGCTT  
CGATACCGCCCTGCGTGCCTTGGCCGAGCACCAACGTCAACACTCCCTCCTGCCCTGTTGC  
ACGCGTATCGGCGGCCAACCCCTCCATTACATGGAGTCCGACTGCCAGCTAAGCACTTTCTGT  
CGGCCGTACAAACAGGCGAAACTGGGACCGGATGGTGATATCCCGCATGTACCCTCGAACTC  
ATCGAGAAGTACGCTCGGATTTACGCTGTTAGGTCTGATTCAGGGTTAACTCGAGTCTGGT  
AAAGAAACCGCTGCTGCGAAATTTGAACGCCAGCACATGGACTCGTCTACTAGCGCAGCTTAA  
TTAACCTAGGCTGCTGCCACCGCTGAGCAATAACTAGCATAACCCCTTGGGGCCTCTAAACGG  
GTCTTGAGGGGTTTTTTGCTGAAAGGAGGAACTATATCCGGATTGGCGAATGGGACGCGCCCT  
GTAGCGGCGCATTAAAGCGCGCGGGTGTGGTGGTTACGCGCAGCGTGACCGCTACACTTGC  
CAGCGCCCTAGCGCCGCTCCTTTTCGTTTCTTCCCTTCTTCTCGCCACGTTCCGCCGGCTT  
TCCCGCTCAAGCTCTAAATCGGGGGCTCCCTTTAGGGTTCCGATTTAGTCTTTACGGCACCT  
CGACCCCAAAAACTTGATTAGGGTACGGTTACAGTACGTTACGTTAGTGGGCCATCGCCCTAGACGGT  
TTTTCGCCCTTTGACGTTGGAGTCCACGTTCTTTAATAGTGGACTCTTGTCCAAACTGGAACA  
ACACTCAACCCTATCTCGGTCTATTCTTTGATTATAAGGGATTTTGGCGATTTCCGGCCTATTG  
GTTAAAAATGAGCTGATTTAAGAAAAATTTAACCGGAATTTTAAACAAATATTAACGTTTACAAT  
TTCTGGCGGCACGATGGCATGAGATTATCAAAAAGGATCTTACCTAAATTTAAATTA  
AATGAAGTTTTAAATCAATCTAAAGTATATATGAGTAACTTGGTCTGACAGTTACCAATGCTTA

ATCAGTGAGGCACCTATCTCAGCGATCTGTCTATTTTCGTTTCATCCATAGTTGCCTGACTCCCCG  
TCGTGTAGATAACTACGATACGGGAGGGCTTACCATCTGCCCCAGTGTGCAATGATACCCG  
GAGACCCACGCTCACCGGCTCCAGATTTATCAGCAATAAACCCAGCCAGCCGGAAGGGCCGAG  
CGCAGAAGTGGTCCTGCAACTTTATCCGCCTCCATCCAGTCTATTAATTGTTGCCGGGAAGCT  
AGAGTAAGTAGTTGCCAGTTAATAGTTTTCGCAACGTTGTTGCCATTGCTACAGGCATCGTG  
GTGTCACGCTCGTCTTTGGTATGGCTTCATTGCTCCGGTCCCAACGATCAAGGGCAGTT  
ACATGATCCCCCATGTTGTGCAAAAAAGCGGTTAGCTCCTTCGGTCCCTCCGATCGTTGTGAGA  
AGTAAGTTGGCCGAGTGTATCACTCATGGTTATGGCAGCACTGCATAATTCTCTTACTGTCA  
TGCCATCCGTAAGATGCTTTTCTGTGACTGGTGTGACTCAACCAAGTCACTCTGAGAATAGTG  
TATGCGGGGACCGAGTTGCTCTTGCCCGGCTCAATACGGGATAATCCGACGGCCACATAGCA  
GAACTTTAAAAAGTCTCATCATTGAAAAAGCTTCTTCGGGGCGAAAACTCTCAAGGATCTTACC  
GCTGTTGAGATCCAGTTCCGATGTAACCCACTCGTGCACCCAAGTATCTTACGATCTTTTACT  
TTCACCAGCGTTTCTGGGTGAGCAAAAAAGGAAAGGCAAAATGCCGCAAAAAAGGGAATAAGG  
GCAGACGGAAATGTTGAATACTCATACTCTCTTTTCAATCATGATTGAAGCATTGTTACGAG  
GTTATTGTCTCATGAGCGGATACATATTTGAATGATTTAGAAAAATAACAAATAGGTCATGAC  
CAAAATCCCTAACGTAAGTTTTCGTTCCACTGAGCGTACAGCCCGTAGAAAAAGATCAAAGG  
ATCTTCTTGAGATCCTTTTTTCTGCGCGTAATCTGCTGCTTGCACAAAAAAACCACCGCTAC  
CAGCGGTGGTTTGTTCGCGGATCAAGAGCTACCAACTCTTTTTCCGAAAGGTAAGTTCAGCA  
GCAGAGCGCAGATACCAATACTGTCTTCTAGTGTAGCCGTAAGTTAGGCCACCACCTCAAGA  
ACTCTGTAGCACCGCTACATACCTCGCTCTGCTAATCCTGTTACCAGTGGCTGCTGCCAGTG  
CGGATAAGTCGTGTCTTACCGGGTGGACTCAAGACGATAGTTACCGGATAAGGCGCAGCGG  
TCGGGCTGAACGGGGGTTCTGTCACACAGCCAGCTTGGAGCGAACGCTACACCCGAACT  
GAGATACCTACAGCGTGTGACTATGAGAAAGCGCCACGCTTCCGAAAGGGAGAAAGGCGGACA  
GGTATCCGGTAAGCGGACGGGTCCGAACAGGAGAGCGCACGAGGGAGCTTCCAGGGGGAAA  
CGCCTGGTATCTTTATAGTCTGTGGGTTTCCGCACCTCTGACTTGAGCGTGCATTTTTGTGA  
TGCTCGTCAGGGGGGGCGGAGCCTATGAAAAAACGCCAGCAACGCGGCCCTTTTACGGTTCT  
GGCCTTTTGTGGCCTTTTGTACATGTTCTTTCTGCGTTATCCCTGATTCTGTGGATAAC  
CGTATTACCGCCTTTGAGTGAGCTGATACCGCTCGCCGCGAGCCGAACGACCGAGCGCAGCGA  
GTCAGTGAGCGAGGAAGCGGAAGAGCGCCTGATGCGGTATTTTCTCCTTACGCATCTGTGCG  
GTATTTACACCGCATATATGGTGCACCTCAGTACAATCTGCTCTGATGCCGCATAGTTAAGC  
CAGTATACACTCCGCTATCGTACGTGACTGGGTGATGGCTGCGCCCCGACACCCGCCAACA  
CCCCTGACCGCCCTGACGGGCTTGTCTGCTCCCGGCATCCGCTTACAGACAAGCTGTGAC  
CGTCTCCGGGAGCTGCATGTGTGAGAGTTTTACCCTCATCACCGAAACGCGCGAGGCGAGC  
TGCGGTAAGCTCATCAGCGTGGTCTGAAAGCAGTTCACAGATGCTGCTGCTGCTCCGCGATG  
CCAGCTCGTTGAGTTTCTCCAGAAGCGTTAATGTCTGGCTTCTGATAAAGCGGGCCATGTTAA  
GGGCGGTTTTTCTGTTTGGTCACTGATGCCCTCCGTGTAAGGGGGATTTCTGTTTCATGGGG  
TAATGATACCGATGAAACGAGAGAGGATGCTCACGATACGGGTTACTGATGATGAACATGCC  
GGTTACTGGAACGTTGTGAGGGTAAACCACTGGCGGTATGGATGCGGACAGAGAAAA  
ATCACTCAGGGTCAATGCCAGCGCTTCTGTTAATACAGATGTAGGTGTTCCACAGGGTAGCCAG  
CAGCATCCTGCGATGCAGATCCGGAACATAATGGTGCAGGGCGCTGACTTCCGCGTTTTCCAG  
ACTTTACGAAACACGGAACCGAAGACCATTGTTGTTGCTCAGGTCCAGACGTTTGGCA  
GCAGCAGTCTGCTTACGTTTCGCTCGGTATCGGTGATTGATTCTGCTAACGAGTAAGGCCAAC  
CCGCCAGCCTAGCCGGTCTCAACGACAGGAGCAGATCATGCTAGTTCATGCCCGCGGCC  
ACCGGAAGGAGCTGACTGGGTTGAAGGCTCTCAAGGGCATCGGTGAGATCCCGGTGCCTAA  
TGAGTGACTAACTTACATTAATTGCGTTGCGCTCACTGCCGCTTTCCAGTCGGGAAACCTG  
TCGTGCCAGTGCATTAATGAATCGGCCAACGCGCGGGGAGAGCGGTTTGCATTTGGCGG  
CCAGGGTGGTTTTTCTTTTACCAGTGAGACGGGCAACAGCTGATTGCCCTTACCAGCCTGGC  
CCTGAGAGAGTTGCAGCAAGCGGTCCACGCTGGTTTGGCCAGCAGGGCAAAATCCTGTTTG  
ATGGTGGTTAACGGCGGGATATAACATGAGCTGTCTTGGTATCGTGCATCCCACTACCGAG  
ATGTCGCAACCAACGCGCAGCCCGGACTCGGTAATGGCGCGCATTGCGCCGAGCGCCATCTG  
ATCGTTGGCAACCAGCATCGCAGTGGGAACGATGCCCTCATTGAGCATTGATGTTGTTG  
AAAACCGGACATGGCACTCCAGTCCGCTTCCCGTTCCGCTATCGGTGAATTTGATTGCGAGT  
GAGATTTTATGCCAGCCAGCCAGACGACGACGCGCCGAGACAGAACTAATGGGCCCCGTA  
ACAGCGCGATTTGCTGGTACCCAAATGCGACCAGATGCTCCACGCCCAGTCCGCTACCGTCT  
TCATGGGAGAAAAATAACTGTTGATGGGTGTCTGGTACAGACATCAAGAAATAACGCCGGGA  
ACATTAGTGCAGGCAGCTTCCACAGCAATGGCATCCTGGTTCATCCAGCGGATGTTAATGATC  
AGCCCACTGACGCGTTGCGCGAGAAGATTGTCACCGCCGCTTACAGGCTTCCGACCGCT  
TCGTTCTACCATCGACACCACCGCTGGCACCCAGTTGATCGGCGCGAGATTTAATCGCCGC  
GACAATTTGCGACGGCGCGTGCAGGGCCAGACTGGAGGTGGCAACGCCAATCAGCAACGACT  
GTTTGGCCCGCAGTTGTTGTGCCACGCGGTTGGGAATGTAATTCAGTCCGCCATCGCCGCT  
CCACTTTTTCCCGGTTTTTCGAGAAACGTTGGTGGCTGGCTGTTTACCACGCGGGAAACGGTCT  
GATAAGAGACACCGGCATACTCTGCGACATCGTATAACGTTACTGGTTTTACATTACCACCCCT  
GAATTGACTCTTCCGGGCGCTATCATGCCATACCGCGAAAGGTTTTGCGCCATTGATGGT  
GTCCGGGATCTCGACGCTCTCCCTTATGCGACTCCTGCATTAGGAAGCAGCCAGTAGTAGGT  
TGAGGCCGTTGAGCACCGCCGCGCAAGGAATGGTGCATGCAAGGAGTGGCCGCAACAG  
TCCCCCGGCCACGGGGCCTGCCACCATACCCACGCCGAAACAAGCGCTCATGAGCCCGAAGT  
GGCGAGCCCGATCTTCCCATCGGTGATGTCGGCGATATAGCGCCAGCAACCGCACCTGTG  
CGCCCGGTGATGCCGGCCACGATCGTCCGGCGTAGAGGATCGAGATCGATCTCGATCCCC  
CGAAATTAATACGACTCACTATA

## 2.3. Cloning

Applying the Gibson Assembly, NoCAR was cloned into a previously prepared pETDuet containing *EcPPTase* in one of the cloning sites.<sup>[8,9]</sup> The original pETDuet plasmid harbored the gene for another CAR enzyme (carboxylate reductase from *Nocardia iowensis*, NiCAR). NiCAR gene was cut with the appropriate restriction enzymes to prepare the vector backbone. All primers and DNA templates were diluted in water. The plasmid pETDuet\_NoCAR/*EcPPTase* is shown in Figure S4. The PCR program used to amplify was as follows:

- 1) Backbone (using carboxylate reductase from *Nocardia iowensis*, NiCAR):  
pETDuet1\_PPTase (5922 base pairs)

- Primers:

- Forward: CTCGAGTCTGGTAAAGAAAC
- Reverse: ATGTATACTCCTTCTTATACTTAAC

- PCR program:

- 98°C for 30 s
- 98°C for 10 s
- 57.2°C for 20 s annealing
- 72°C for 2 min extension
- 72°C for 2 min final extension

25x

- 2) Second fragment (NoCAR):

3613 base pairs

- Primers:

- Forward: TATAAGAAGGAGATATACATATGCATCATCACCATCAC
- Reverse: GTTTCTTTACCAGACTCGAGTTAACCCTGAATCAGACC

- PCR program:

- 98°C for 30 s
- 98°C for 10 s
- 58.8°C for 20 s annealing
- 72°C for 2 min extension
- 72°C for 2 min final extension

25x

## 3. Optimization of the NoCAR production in *E. coli*

### 3.1. Medium optimization in *E. coli* BL21

**Table S3:** Protein content (mg mL<sup>-1</sup>) of soluble and insoluble fractions of NoCAR produced in different medium and induction conditions in *E. coli* BL21

| Medium | Soluble fractions |         | Insoluble fractions |         |
|--------|-------------------|---------|---------------------|---------|
|        | Samples           | (mg/mL) | Samples             | (mg/mL) |
| LB     | 3h                | 1.76    | 3h                  | 1.7     |
|        | 6h                | 1.4     | 6h                  | 2.25    |
|        | 24h               | 1.74    | 24h                 | 7.3     |
|        | 48h               | 1.94    | 48h                 | 9.56    |
|        | 72h               | 1.11    | 72h                 | 9.55    |
| AI     | 3h                | 1.55    | 3h                  | 1.79    |
|        | 6h                | 5.64    | 6h                  | 1.01    |
|        | 24h               | 7.92    | 24h                 | 12.5    |
|        | 48h               | 5       | 48h                 | 12.9    |
|        | 72h               | 7.1     | 72h                 | 9.21    |
| TB     | 3h                | 2       | 3h                  | 2.27    |
|        | 6h                | 1.93    | 6h                  | 3.91    |
|        | 24h               | 5.1     | 24h                 | 9.34    |
|        | 48h               | 7.71    | 48h                 | 17.6    |
|        | 72h               | 5.7     | 72h                 | 19.1    |

### 3.2. Optimization in *E. coli* Tuner

As already mentioned in the main manuscript, producing soluble NoCAR in sufficient amounts turned out to be challenging, hindering purification and characterization attempts. Thus, it was essential to find cultivation conditions that could increase the amount of soluble recombinant protein expression as much as possible. Those were the cultivation temperature, OD<sub>600</sub> at induction, and IPTG concentration. All of them can be varied smoothly and without much effort, compared to co-expression of molecular chaperons or codon optimization, which would be much more time consuming.<sup>[10]</sup> After deciding on the parameters, the experiments were designed. This step was done according to a central composite design (CCD). The table below shows the cultivation conditions for a CCD in 15 experiments (great part of them were performed in duplicates). Therefore, the operational window was determined empirically or by suggestions from literature.<sup>[10,11]</sup>

**Table S4:** CCD for the optimization of the expression of *NoCAR* in *E. coli* Tuner

| Run Nr. | T (°C) | IPTG (mM) | OD <sub>600</sub> |
|---------|--------|-----------|-------------------|
| 1       | 15     | 0.1       | 0.6               |
| 2       | 17     | 0.05      | 0.4               |
| 3       | 17     | 0.15      | 0.4               |
| 4       | 17     | 0.05      | 0.8               |
| 5       | 17     | 0.15      | 0.8               |
| 6       | 20     | 0.03      | 0.6               |
| 7       | 20     | 0.1       | 0.2               |
| 8       | 20     | 0.1       | 1.0               |
| 9       | 20     | 0.1       | 0.6               |
| 10      | 20     | 0.2       | 0.6               |
| 11      | 23     | 0.05      | 0.4               |
| 12      | 23     | 0.15      | 0.4               |
| 13      | 23     | 0.05      | 0.8               |
| 14      | 23     | 0.15      | 0.8               |
| 15      | 25     | 0.1       | 0.6               |

All the data was gathered from the small-scale cultivation (100 mL) of *NoCAR*. Densitometric analysis with the aid of the *ImageJ* software, in combination with protein concentrations determined by Bradford assay (described in the experimental section in the main manuscript), was used to estimate the total soluble *NoCAR* protein concentration (in mg/mL). For modeling and optimization, only the soluble fractions collected after 48 h of cultivation were considered. The quadratic surface obtained is shown in Figure 2A in the main manuscript. To obtain the optimal process conditions for the cultivation of soluble *NoCAR*, the quadratic had to be maximized using a genetic algorithm. Genetic algorithms are a group of models that are inspired by the process of natural selection and are capable of generating high-quality solutions for both, constrained and unconstrained optimization and search problems<sup>[12]</sup>. The output of this was the cultivation conditions depicted in the main manuscript (0.9-1.0 OD<sub>600</sub> at induction, 0.18 mM IPTG concentration, and a cultivation temperature of 15°C). It is essential to evaluate the performance of a model to develop an understanding of how well it generalizes to new data. Thus, a very common and popular metric for the evaluation of the performance of a regression model is the mean squared error (mse). It describes the average of the squares of errors and is an accurate measure of a model's predictive power. In other words, mse is the average squared difference between the estimated values and the actual value. In our work, the quadratic model showed an mse score of 0.19. The equation<sup>[13]</sup> used to fit the data is shown below:

$$y = \beta_0 + \sum_{i=1}^k \beta_i x_i + \sum_{i < j} \sum \beta_{ij} x_i x_j + \sum_{i=1}^k \beta_{ii} x_i^2 + \epsilon.$$

in which  $y$  corresponds to the response of interest,  $x_i$  and  $x_j$  are numbers of associated control (or input) variables,  $\beta$  is a vector of  $p$  unknown constant coefficients referred to as parameters, and  $\epsilon$  is a random experimental error assumed to have a zero mean. All this additional information were added to the SI material.

Thus, a mean squared error of 0.19 mg/mL and a standard deviation of 0.18 were determined by a 10-fold cross-validation for the quadratic system.

#### 4. Optimization of the post-translational modification of NoCAR via incubation assay

The incubation of purified NoCAR expressed in *E. coli* Tuner with purified EcPPTase and acetyl-CoA was performed under different conditions. Measuring parameters were the amount of EcPPTase, concentration of acetyl-CoA, and incubation time. In each case, the specific activity using the photometric-based assay described in the experimental section of the main manuscript. Variables, conditions tested, and the best conditions are shown in Table S5. The initial parameters that were evaluated to determine the best *in vitro* conditions for the activation of NoCAR were decided based on previous works.<sup>[7]</sup> Besides, these initial parameters were chosen because we believed they were the ones which could have the highest influence on the *in vitro* activation of NoCAR. The PPTase from *E. coli* was produced and purified to be used in this study. Here, we were limited by the protein content of the protein preparation containing the PPTase. In this case, the protein concentration of this preparation was about 0.272 mg mL<sup>-1</sup> (determined by the Bradford assay). Therefore, the operational window for this specific parameter was decided based on this limiting protein content.



**Table S5:** Post-translational modification of NoCAR<sup>a</sup>: optimization of the incubation assay

| Entry | Construct                   | Experimental                                                                                                             | Variable                 | Specific activity (U/mg) | Best condition  |
|-------|-----------------------------|--------------------------------------------------------------------------------------------------------------------------|--------------------------|--------------------------|-----------------|
| 1     | NoCAR + acetyl-CoA + PPTase | 50 $\mu$ L + 25 $\mu$ L acetyl-CoA ( <b>1 mM</b> ) + 25 $\mu$ L PPTase (0.143 mg/mL) → incubation (1 h, 28°C, 600 rpm)   | acetyl-CoA concentration | 0.010                    | 2 mM acetyl-CoA |
| 2     | NoCAR + acetyl-CoA + PPTase | 50 $\mu$ L + 25 $\mu$ L acetyl-CoA ( <b>2 mM</b> ) + 25 $\mu$ L PPTase (0.143 mg/mL) → incubation (1 h, 28°C, 600 rpm)   |                          | 0.012                    |                 |
| 3     | NoCAR + acetyl-CoA + PPTase | 50 $\mu$ L + 25 $\mu$ L acetyl-CoA ( <b>5 mM</b> ) + 25 $\mu$ L PPTase (0.143 mg/mL) → incubation (1 h, 28°C, 600 rpm)   |                          | 0.011                    |                 |
| 4     | NoCAR + acetyl-CoA + PPTase | 50 $\mu$ L + 25 $\mu$ L acetyl-CoA (2 mM) + 25 $\mu$ L PPTase ( <b>0.075 mg/mL</b> ) → incubation (1 h, 28°C, 600 rpm)   | EcPPTase concentration   | 0.0092                   | 0.143 mg/mL     |
| 5     | NoCAR + acetyl-CoA + PPTase | 50 $\mu$ L + 25 $\mu$ L acetyl-CoA (2 mM) + 25 $\mu$ L PPTase ( <b>0.143 mg/mL</b> ) → incubation (1 h, 28°C, 600 rpm)   |                          | 0.0108                   |                 |
| 6     | NoCAR + acetyl-CoA + PPTase | 50 $\mu$ L + 25 $\mu$ L acetyl-CoA (2 mM) + 25 $\mu$ L PPTase ( <b>0.272 mg/mL</b> ) → incubation (1 h, 28°C, 600 rpm)   |                          | 0.0107                   |                 |
| 7     | NoCAR + acetyl-CoA + PPTase | 50 $\mu$ L + 25 $\mu$ L acetyl-CoA (2 mM) + 25 $\mu$ L PPTase (0.143 mg/mL) → incubation ( <b>0.5 h</b> , 28°C, 600 rpm) | Time of incubation       | 0.010                    | 2 h             |
| 8     | NoCAR + acetyl-CoA + PPTase | 50 $\mu$ L + 25 $\mu$ L acetyl-CoA (2 mM) + 25 $\mu$ L PPTase (0.143 mg/mL) → incubation ( <b>1 h</b> , 28°C, 600 rpm)   |                          | 0.011                    |                 |
| 9     | NoCAR + acetyl-CoA + PPTase | 50 $\mu$ L + 25 $\mu$ L acetyl-CoA (2 mM) + 25 $\mu$ L PPTase (0.143 mg/mL) → incubation ( <b>2 h</b> , 28°C, 600 rpm)   |                          | 0.022                    |                 |

a] Protein concentration of NoCAR stock solution was always determined via Bradford assay prior to each incubation assay. The protein concentration ranged from 18 to 25 mg/mL.

## 5. Biocatalytic reduction reactions with *in vitro* recycling of cofactors

### 5.1. Auxiliary enzymes for the regeneration of both cofactors

The full recycling of both cofactors was achieved using the following auxiliary enzymes: the simultaneous action of polyphosphate kinases from *Meiothermus ruber* (MrPPK) and *Sinorhizobium meliloti* (SmPPK) for the regeneration of ATP and a glucose dehydrogenase (GDH) for the regeneration of NADPH. Finally, the inhibitory effects of pyrophosphate (PP), which is generated *in situ* during the catalytic cycle of CARs, is surpassed by using the pyrophosphatase from *Escherichia coli* (EcPPase). GDH from *Pseudomonas* sp. was commercially available and obtained from Sigma-Aldrich (Steinheim, Germany).

His-tagged MrPPK was used similarly as described previously by Parnell *et al.*<sup>[14]</sup>. SmPPK was expressed from the pET28+ vector constructed previously by Mordhorst *et*

*al.*<sup>[14,15]</sup> *E. coli* BL21 (DE3) Star served as the production host. Cells were cultivated in LB medium and PPKs expression was induced by addition of 0.5 mM IPTG at 28°C. Cell disruption and purification was performed as described for NoCAR. Liquid stocks of purified PPKs were stored at -20°C. Protein concentrations were determined with the Bradford assay following the procedure described in the experimental section of the main manuscript.

Strep-tagged *EcPPase* was expressed from the pETSTREP3 vector as constructed previously by Pfeiffer et al.<sup>[16]</sup> Similarly, *E. coli* BL21(DE3) Star served as the expression host and was cultivated in LB medium at 37°C. *EcPPase* expression was induced by addition of 0.5 mM IPTG. Purification was performed under standard conditions using a gravity flow strep tacin sepharose column as the stationary phase. Protein concentrations were determined with the Bradford assay following the procedure described in the experimental section of the main manuscript.

Liquid stocks of purified *EcPPase* was stored at -20°C. Full characterization of both PPKs and *EcPPase* in terms of enzyme activity was determined and described by Strohmeier et al.<sup>[8]</sup>

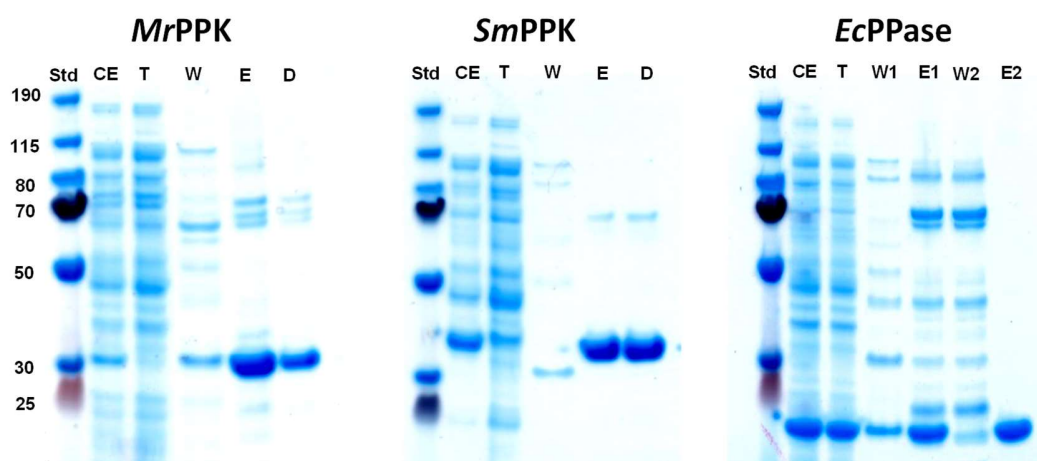

**Figure S5.** SDS gel analysis for the purification steps of the ATP-recycling enzymes used in this study. Legend: CE: crude cell extract; T: throughput fraction; W: washed fraction; E: eluted fraction; D: desalted fraction. *EcPPase* had in total two washing and elution steps.

## 5.2. Reaction components and setup

The components and stock solutions prepared for the biotransformations with *in vitro* recycling of ATP and NADPH are shown in Tables S5 and S6.

**Table S5:** Components and stock concentrations for the NoCAR-catalyzed biotransformations

| <b>Reaction mixture preparation</b> |                                          |                                           |
|-------------------------------------|------------------------------------------|-------------------------------------------|
| <b>Key components</b>               | <b>Concentration in reaction (mM)</b>    | <b>Concentration in stock (mM)</b>        |
| 4xMOPS buffer pH 7.5                | 100                                      | 400                                       |
| Sodium benzoate                     | 5                                        | 250                                       |
| NADPH                               | 0.5                                      | 50                                        |
| ATP                                 | 1                                        | 50                                        |
| MgCl <sub>2</sub>                   | 6.25                                     | 50                                        |
| Sodium polyphosphate                | 4 mg/mL                                  | 50 mg/mL                                  |
| β-D-(+)-glucose                     | 50                                       | 200                                       |
| <b>Auxiliary enzymes</b>            | <b>Concentration in reaction (μg/mL)</b> | <b>Concentration in the stock (μg/mL)</b> |
| <i>MrPPK</i>                        | 100                                      | 2220                                      |
| <i>SmPPK</i>                        | 40                                       | 1100                                      |
| <i>EcPPase</i>                      | 25                                       | 754                                       |
| GDH                                 | 0.2                                      | 50                                        |

**Table S6:** Reaction mixture for the NoCAR-catalyzed biotransformations

| <b>Mastermix for all reactions</b>                             |                             |
|----------------------------------------------------------------|-----------------------------|
| <b>Components</b>                                              | <b>Volume/reaction (μL)</b> |
| H <sub>2</sub> O Milli-Q                                       | 36.4                        |
| 4xMOPS buffer containing MgCl <sub>2</sub> and β-D-(+)-glucose | 62.5                        |
| Coenzyme stock (GDH and ATP-recycling enzymes)                 | 98.6                        |
| NADPH                                                          | 2.5                         |
| ATP                                                            | 5                           |
| Sodium polyphosphate                                           | 20                          |
| Bromothymol blue (indicator)                                   | 5                           |
| <b>Reaction vial/eppi</b>                                      | <b>Volume (μL)</b>          |
| Mastermix                                                      | 230                         |
| Substrate (250 mM stock)                                       | 5                           |
| NoCAR/ <i>EcPPase</i> (2.5 mg/mL stock)                        | 10                          |
| Addition of KOH (1 M)                                          | 5                           |
| <b>Total</b>                                                   | <b>250</b>                  |

The components MgCl<sub>2</sub> and β-D-(+)-glucose were added to the 4x buffer. The total volume of reaction was 250 μL. 5 μL of 1 M KOH was added after starting the reaction for pH adjustment.

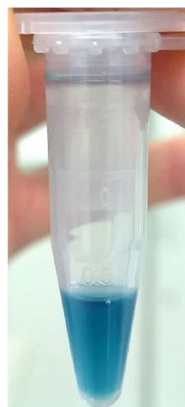

**Figure S6.** Reaction mixture (250  $\mu$ L total volume) performed in a 1.5 mL Eppendorf tube. The blue colour results from the dissociation of Bromothymol blue in solutions that are more basic.

### 5.3. Investigation of optimal reaction conditions

#### 5.3.1. Type of buffer

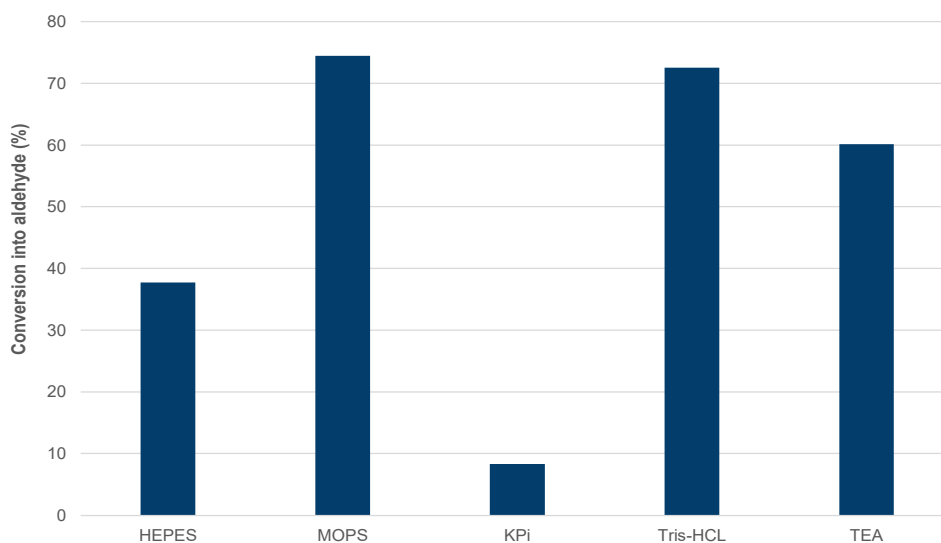

**Figure S7.** Evaluation of different types of buffer. Composition in 250  $\mu$ L reaction volume: 100 mM buffer (pH 7.5), 6.25 mM  $MgCl_2$ , 50 mM glucose, 5 mM sodium benzoate, 4 mg  $mL^{-1}$  sodium polyphosphate, 1 mM ATP, 0.5 mM NADPH, 100  $\mu g mL^{-1}$  *NoCAR/EcPPTase*, 100  $\mu g mL^{-1}$  *MrPPK*, 40  $\mu g mL^{-1}$  *SmPPK*, 25  $\mu g mL^{-1}$  *EcPPase*, 50  $\mu g mL^{-1}$  GDH, 30°C, 750 rpm. Buffers: KPi: potassium phosphate, TEA: triethanolamine. Sampling after 1 h of reaction with subsequently HPLC analysis. Values shown are mean values of technical triplicates ( $n_{biological} = 1$ ). Error bars for the technical replicates were too small to indicate.<sup>[17][18]</sup>

### 5.3.2. Temperature of reaction

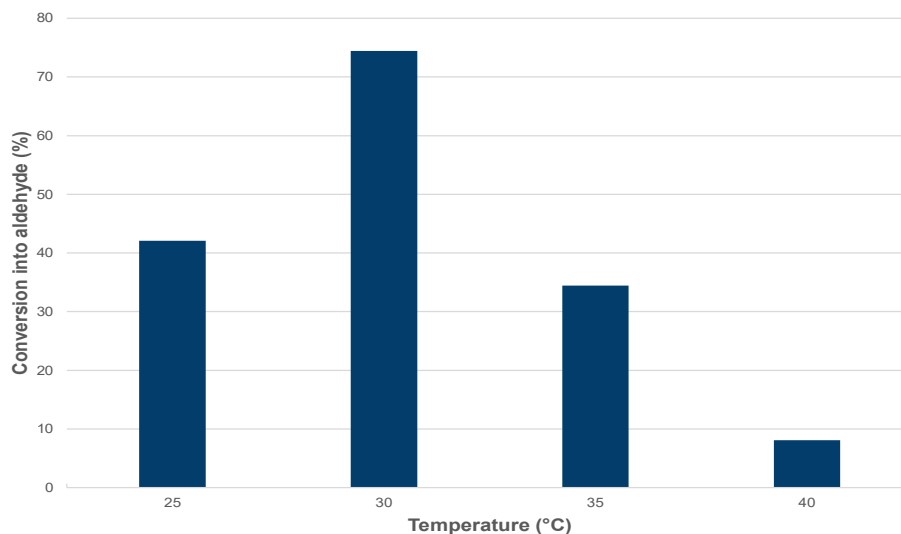

**Figure S8.** Evaluation of different reaction temperatures. Composition in 250  $\mu$ L reaction volume: 100 mM MOPS buffer (pH 7.5), 6.25 mM  $MgCl_2$ , 50 mM glucose, 5 mM sodium benzoate, 4 mg  $mL^{-1}$  sodium polyphosphate, 1 mM ATP, 0.5 mM NADPH, 100  $\mu g mL^{-1}$  *NoCAR/EcPPTase*, 100  $\mu g mL^{-1}$  *MrPPK*, 40  $\mu g mL^{-1}$  *SmPPK*, 25  $\mu g mL^{-1}$  *EcPPase*, 50  $\mu g mL^{-1}$  *GDH*, 750 rpm. Sampling after 1 h of reaction with subsequently HPLC analysis. Values shown are mean values of technical triplicates ( $n_{biological} = 1$ ). Error bars for the technical replicates were too small to indicate.<sup>[17][18]</sup>

### 5.3.3. Concentration of *NoCAR/EcPPTase*

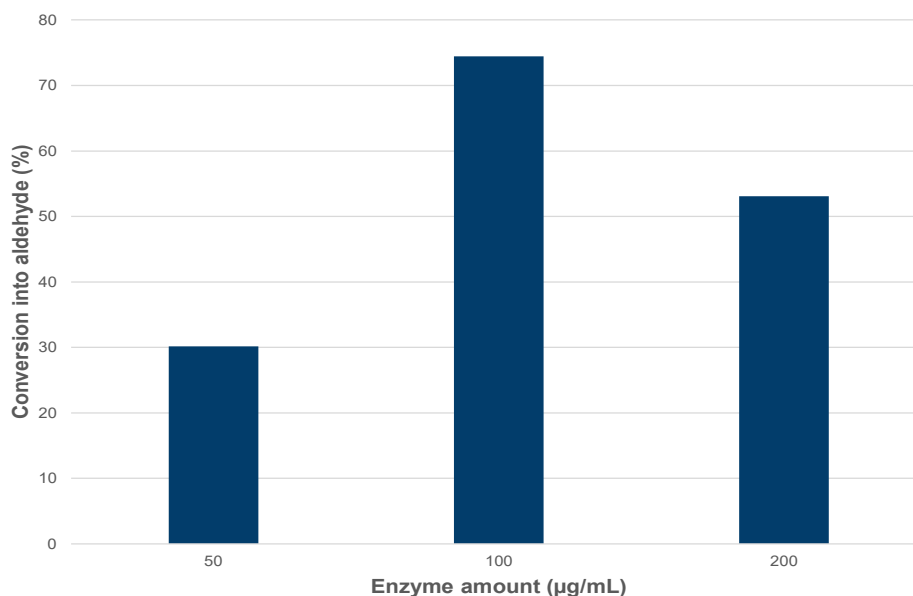

**Figure S9.** Evaluation of varying concentrations of *NoCAR/EcPPTase*. Composition in 250  $\mu$ L reaction volume: 100 mM MOPS buffer (pH 7.5), 6.25 mM  $MgCl_2$ , 50 mM glucose, 5 mM sodium benzoate, 4 mg  $mL^{-1}$  sodium polyphosphate, 1 mM ATP, 0.5 mM NADPH, *NoCAR/EcPPTase*, 100  $\mu g mL^{-1}$  *MrPPK*, 40  $\mu g mL^{-1}$  *SmPPK*, 25  $\mu g mL^{-1}$  *EcPPase*, 50  $\mu g mL^{-1}$  *GDH*, 30°C, 750 rpm. Sampling after 1 h of reaction with subsequently HPLC analysis. Values shown are mean values of technical triplicates ( $n_{biological} = 1$ ). Error bars for the technical replicates were too small to indicate.<sup>[17][18]</sup>

## 6. Analytics

### 6.1. Calibration curves

The calibration curves constructed to determine the conversions of sodium benzoate (NaBZ), benzaldehyde (BA) and benzyl alcohol (BZ alcohol) are shown below. The internal standard used was ethyl *para*-hydroxybenzoate.

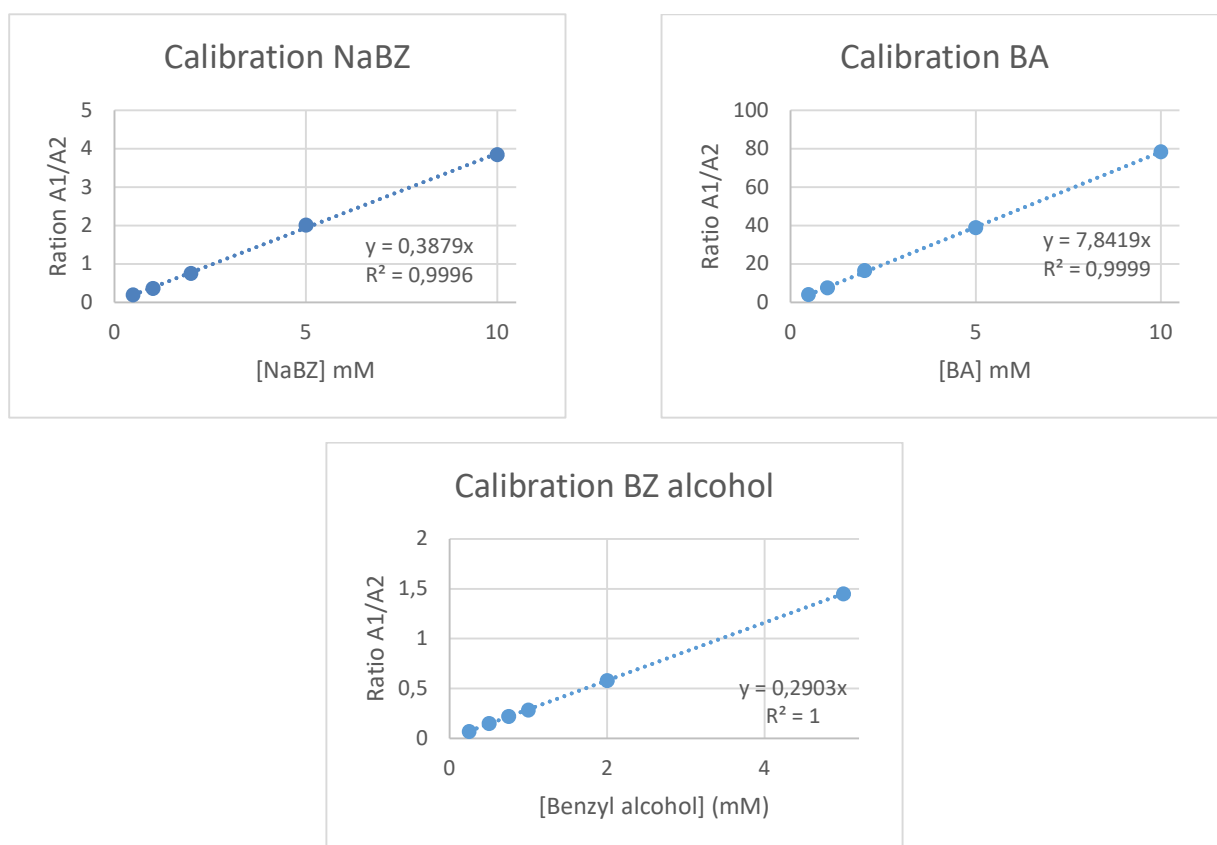

**Figure S10.** Calibration curves for sodium benzoate (NaBZ), benzaldehyde (BA), and benzyl alcohol (BZ alcohol). The y-axis corresponds to the ration of the area of one of these compounds (A1) and the area of the internal standard (A2).

## 6.2. Chromatogram

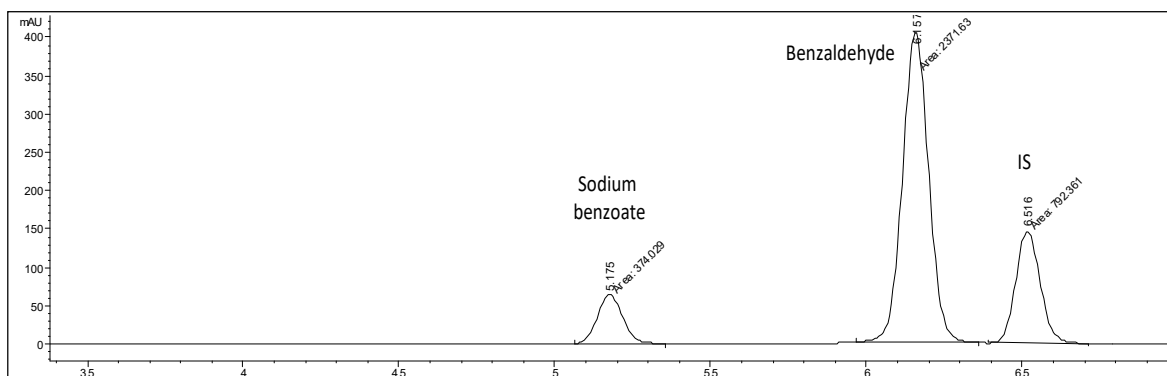

Figure S11. Exemplary chromatogram for an *in vitro* reaction.

## References

- [1] "carboxylic acid reductase [*Nocardia otitidiscaviarum*]," can be found under [https://www.ncbi.nlm.nih.gov/protein/WP\\_029928026.1](https://www.ncbi.nlm.nih.gov/protein/WP_029928026.1), **2020**.
- [2] H. Stolterfoht, D. Schwendenwein, C. W. Sensen, F. Rudroff, M. Winkler, *J. Biotechnol.* **2017**, *257*, 222–232.
- [3] M. Winkler, *Curr. Opin. Chem. Biol.* **2018**, *43*, 23–29.
- [4] "phosphopantetheinyl transferase, subunit of enterobactin synthase multienzyme complex [*Escherichia coli* BL21(DE3)]," can be found under <https://www.ncbi.nlm.nih.gov/protein/CAQ31055.1/>, **2020**.
- [5] J. Beld, E. C. Sonnenschein, C. R. Vickery, J. P. Noel, M. D. Burkart, **2015**, *31*, 61–108.
- [6] S. R. Derrington, N. J. Turner, S. P. France, *J. Biotechnol.* **2019**, *304*, 78–88.
- [7] P. Venkitasubramanian, L. Daniels, J. P. N. Rosazza, *J. Biol. Chem.* **2007**, *282*, 478–485.
- [8] G. A. Strohmeier, I. C. Eiteljörg, A. Schwarz, M. Winkler, *Chem. - A Eur. J.* **2019**, *25*, 6119–6123.
- [9] D. Schwendenwein, G. Fiume, H. Weber, F. Rudroff, M. Winkler, *Adv. Synth. Catal.* **2016**, *358*, 3414–3421.
- [10] J. Kaur, A. Kumar, J. Kaur, *Int. J. Biol. Macromol.* **2018**, *106*, 803–822.
- [11] C. P. Papaneophytou, G. Kontopidis, *Protein Expr. Purif.* **2014**, *94*, 22–32.
- [12] D. Whitley, *Stat. Comput.* **1994**, *4*, 65–85.
- [13] I. Khuri, S. Mukhopadhyay, **2010**, DOI 10.1002/wics.73.
- [14] A. E. Parnell, S. Mordhorst, F. Kemper, M. Giurrandino, J. P. Prince, N. J. Schwarzer, A. Hofer, D. Wohlwend, H. J. Jessen, S. Gerhardt, et al., *Proc. Natl. Acad. Sci. U. S. A.* **2018**, *115*, 3350–3355.

- [15] S. Mordhorst, J. Siegrist, M. Müller, M. Richter, J. N. Andexer, *Angew. Chemie - Int. Ed.* **2017**, *56*, 4037–4041.
- [16] M. Pfeiffer, D. Bulfon, H. Weber, B. Nidetzky, *Adv. Synth. Catal.* **2016**, *358*, 3809–3816.
- [17] G. Cumming, F. Fidler, D. L. Vaux, *J. Cell Biol.* **2007**, *177*, 7–11.
- [18] D. L. Vaux, F. Fidler, G. Cumming, *EMBO Rep.* **2012**, *13*, 291–296.
